# Supplementary material for: Self-supervised learning of accelerometer data provides new insights for sleep and its association with mortality
Source: PubMed Central journal article supplement (PMC11106264; doi:10.1038/s41746-024-01065-0), 2024-06-30
Supplement: 41746_2024_1065_MOESM2_ESM.pdf [file 41746_2024_1065_MOESM2_ESM.pdf]

## 689 1. Supplementary methods

### 690 1.1. Datasets

Supplementary Table 1: **Characteristics of the datasets used for internal validation, external validation and health association analyses** “Patient” indicates whether a cohort consists of sleep patients in a clinic.

| Name         | n       | Age             | Placement     | Device    | Patient | Publication |
|--------------|---------|-----------------|---------------|-----------|---------|-------------|
| UK Biobank   | 103,561 | $62.3 \pm 7.9$  | Dom wrist     | Axivity   | ✗       | [1]         |
| Raine Gen1   | 865     | $56.7 \pm 5.6$  | Dom wrist     | GT3X      | ✗       | [2]         |
| Raine Gen2   | 795     | $22.1 \pm 0.6$  | Dom wrist     | GT3X      | ✗       | [2]         |
| Newcastle    | 28      | $44.9 \pm 14.9$ | Both wrists   | GENEActiv | ✓       | [3]         |
| Leicester    | 30      | $30.8 \pm 6.7$  | Both wrists   | Axivity   | ✗       | [4]         |
| Pennsylvania | 22      | $22.8 \pm 4.5$  | Non-dom wrist | Axivity   | ✗       | [5]         |

691 *Raine Study.* The Raine Study has followed up roughly 2900 children since 1989 in  
692 Australia. A subset of children (Raine Gen2, 50% females) at the age of 22 and their  
693 parents (Raine Gen1, 57% females) were invited to undergo one night of laboratory-  
694 based polysomnography at Western Australia’s Center for Sleep Science [2, 6]. Every  
695 participant was instructed to wear an ActiGraph GT3X device on the dominant  
696 wrist. Earlier GT3X firmware would enter an idle mode to save the battery when no  
697 sufficient movement was detected, so we only included participants with no missing  
698 data and those without repeated values longer than one minute for the Raine Gen2  
699 cohort.

700 *Newcastle.* The Newcastle dataset recruited 28 adult patients (39% females) for a  
701 one night laboratory-based polysomnography assessment in Newcastle upon Tyne,  
702 UK, as part of their routine clinical visit [3]. During the polysomnography recording,  
703 the participants wore two GENEActive devices, one on each wrist. The sampling  
704 frequency for the wristbands was set to 85.7 Hz.

705 *Leicester.* Thirty healthy volunteers (63% females and 73% white) wore three de-  
706 vices: GENEActive, Axivity AX3, and ActiGraph GT9X on each wrist during one  
707 night of laboratory-based polysomnography assessment [4]. The relative position of  
708 the devices was randomly allocated for each participant. The devices were set to  
709 record at 100 Hz. During the lab visit, when the participants wished to go to bed,  
710 the recording was started. The sleep episodes usually ended between 6 am and 7  
711 am the following morning. We cleaned up the recording sessions such that every  
712 recording would start from “light off” and end at “light off” to ensure comparability.

713 *Pennsylvania.* The Pennsylvania dataset consists of 22 healthy sleepers who had one-  
714 night of laboratory-based polysomnography assessment at the University of Penn-  
715 sylvania Center for sleep [5]. The participants were asked to wear an Axivity device  
716 on the non-dominant wrist during the polysomnography session.

717 *UK Biobank.* The UK Biobank is a longitudinal cohort study that recruited 500,000  
718 adults from the UK [7]. A subset of the participants was invited to wear an Axivity  
719 device on the dominant wrist for one week in a free-living environment [1]. The sam-  
720 pling rate was set to 100 Hz. Roughly 100,000 participants (56% females) consented  
721 and participated in the accelerometry study. Other than the accelerometry data, a  
722 rich set of biomedical information was also collected on the study participants, such  
723 as health record linkage, self-reported questionnaire and genetic data.

724 We preprocessed all the datasets by manual quality checks for unrealistic high  
725 values for accelerometry ( $>200$  mg), parsing successes, polysomnography alignment,  
726 and visual inspection.

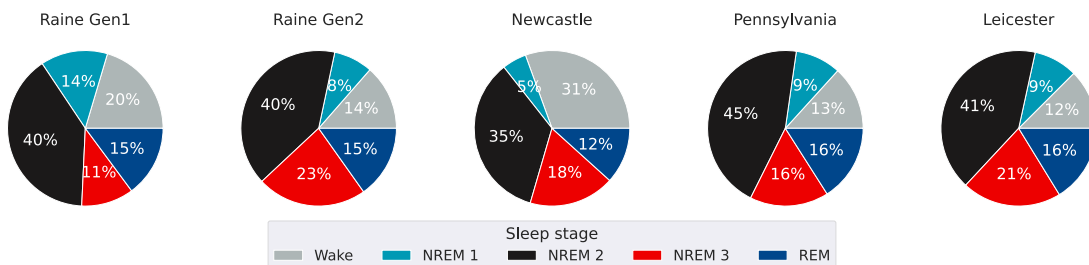

Supplementary Figure 1: **Sleep stage distribution for all the datasets used.**

727 *1.2. Model development*

728 *1.2.1. Self-supervised pre-training*

729 To obtain a feature extractor by leveraging a large amount of unlabelled data  
 730 from the UK Biobank, we applied multi-task self-supervised learning following [8].  
 731 In self-supervision pre-training, the model was designed to discriminate whether a  
 732 set of binary transformations have been applied to the signal. We selected reversal,  
 733 permutation, and time-warping as potential self-supervised learning because they are  
 734 suitable for learning spatiotemporal patterns.

735 The feature extractor was built on top of ResNet-17 V2 [9] with 1D convolution,  
 736 in total, with 10M parameters. Each feature vector is of size 1024. We used cross-  
 737 entropy as the cost function, with each task having the same weight to balance the  
 738 features learned from each task. In the training procedure, we applied axis swap and  
 739 rotation as data augmentation to obtain a representation that is orientation invariant.  
 740 During training time, we used a batch size of 2000 as a larger batch size was found  
 741 to produce features with better quality. Adam [10] was used for optimisation with a  
 742 learning rate of 1e-3. We distributed the training across 4 Tesla V100-SXM2 GPUs  
 743 with 32GB. Early-stopping with a patience of five steps was used to avoid overfitting.

744 It took about 420 GPU hours for the model to converge. More details can be found  
745 in [8].

### 746 1.2.2. *SleepNet training*

747 We used the pre-trained ResNet from self-supervision as the base model for fea-  
748 ture extraction. Then, we appended two layers of Bi-directional Long-Short-Term-  
749 Memory (LSTM) layers of 1024 units to learn the temporal dependencies of the  
750 model [11]. In the end, we had two fully-connected layers of 512 units to generate the  
751 sleep stages. The model was trained to discriminate five sleep stages directly (wake,  
752 N1, N2, N3 and REM). To obtain the three-class output, we combined NREM I, II,  
753 and III into the NREM class. Likewise, we combined NREM I, II, III and NREM  
754 into the sleep class to obtain the two-class output.

755 The learning rate was set to be 1e-3. We also set the gradient clapping to 1 to  
756 avoid exploding gradient for LSTM. We used weighted Cross-Entropy as the objective  
757 function and weighted each class with the inverse of its frequency to account for the  
758 imbalanced dataset. We also used rotation and axis swap to augment the input data  
759 to obtain a direction-invariant model. Each training mini-batch consisted of five  
760 participants. For each individual, we selected four 1.5-hour sequences with random  
761 starting points to avoid overfitting to the study protocol, where the beginning and  
762 the end of the sequence are always the “wake” class. The model was trained on a  
763 Tesla V100-SXM2 with 32GB of memory. It took about 12 hours for the model to  
764 converge. The model performance was reported using five-fold subject-wise cross-  
765 validation. We first split the data into train/test with a ratio of 8:2. We further split  
766 the train set into train/validation with a ratio of 8:2. We used early stopping with a

767 patience of ten steps to avoid overfitting on the validation set in each cross-validation  
 768 fold.

Supplementary Table 2: **Hand-crafted features**

| Handcrafted features              | Notes                                                                                                                                                                                                                           |
|-----------------------------------|---------------------------------------------------------------------------------------------------------------------------------------------------------------------------------------------------------------------------------|
| Sleep features [12]               |                                                                                                                                                                                                                                 |
| ENMO                              | All sleep features have 12 derived variables:<br>mean, std, min, max, entropy 20 bins (low resolution),<br>entropy 200 bins (high resolution), median absolute derivation,<br>and mean difference between neighbouring windows. |
| Angle Z                           |                                                                                                                                                                                                                                 |
| Locomotor inactivity during sleep |                                                                                                                                                                                                                                 |
| Axis features [13]                |                                                                                                                                                                                                                                 |
| Mean                              | 1 per axis                                                                                                                                                                                                                      |
| Standard deviation                | 1 per axis                                                                                                                                                                                                                      |
| Range                             | 1 per axis                                                                                                                                                                                                                      |
| Inter-quantile-range              | 1 per axis                                                                                                                                                                                                                      |
| Correlation of variations         | 1 per axis                                                                                                                                                                                                                      |
| Features on the vector norm [13]  | $\text{norm} = \sqrt{x^2 + y^2 + z^2}$                                                                                                                                                                                          |
| Mean                              |                                                                                                                                                                                                                                 |
| Standard deviation                |                                                                                                                                                                                                                                 |
| Inter-quantile-range              |                                                                                                                                                                                                                                 |
| Median absolute derivation        |                                                                                                                                                                                                                                 |
| Kurtosis                          |                                                                                                                                                                                                                                 |
| Skew                              |                                                                                                                                                                                                                                 |
| Truncated ENMO                    |                                                                                                                                                                                                                                 |
| Absolute value of ENMO            |                                                                                                                                                                                                                                 |
| Entropy                           |                                                                                                                                                                                                                                 |
| Dominant Frequency                |                                                                                                                                                                                                                                 |
| Total power                       |                                                                                                                                                                                                                                 |
| Dominant frequencies              | 3 features: 0.3-5 Hz, 0.3-15 Hz, and 0.6-2.5 Hz                                                                                                                                                                                 |
| Dominant frequency power          | 3 features: 0.3-5 Hz, 0.3-15 Hz, and 0.6-2.5 Hz                                                                                                                                                                                 |
| Second dominant frequency         | 1 feature: 0.3-15 Hz                                                                                                                                                                                                            |
| Fourier transform coefficients    | 11 features: 1 Hz - 11 Hz                                                                                                                                                                                                       |
| Fourier coefficients              | 12 features: 1st - 12th coefficient                                                                                                                                                                                             |

Supplementary Table 3: **Model performance metric definitions (TP: true positive; TN: true negative; FP: false positive; FN: false negative)**

| Metric             | Definition                                                                                                 |
|--------------------|------------------------------------------------------------------------------------------------------------|
| Precision          | $\frac{TP}{TP+FP}$                                                                                         |
| Sensitivity/Recall | $\frac{TP}{TP+FN}$                                                                                         |
| Specificity        | $\frac{TN}{TN+FP}$                                                                                         |
| Accuracy           | $\frac{TP+TN}{TP+TN+FP+FN}$                                                                                |
| F1                 | $2 \times \frac{\text{precision} \cdot \text{recall}}{\text{precision} + \text{recall}}$                   |
| Kappa              | $1 - \frac{1-p_o}{1-p_e}$<br>$p_o$ : relative observed agreement<br>$p_e$ : expected agreement probability |
| Balanced accuracy  | $\frac{1}{n} \sum_i \text{Accuracy}_{class_i}$                                                             |

Supplementary Table 4: **Sleep parameter definitions: total sleep duration (TSD), rapid-eye-movement (REM), non-rapid-eye-movement (NREM), sleep onset latency (SOL), wake after sleep onset (WASO), and sleep efficiency (SE).**

| Parameter                     | Definition                                                                                                                                                                                  |
|-------------------------------|---------------------------------------------------------------------------------------------------------------------------------------------------------------------------------------------|
| Total sleep duration (TSD)    | The total time spent in sleep during the recording period per day.                                                                                                                          |
| Overnight sleep duration      | The longest sleep window duration (max one hour of sleep discontinuity allowed) over a noon-to-noon interval.                                                                               |
| Time in bed                   | The amount of time spent in bed: A person might not be asleep during this period. Our time in bed was estimated using a random forest model that was trained using data from sleep diaries. |
| Sleep onset latency (SOL)     | The time difference between when one gets in bed and the sleep onset. The sleep onset (SOL) is defined as the first occurrence of three consecutive 30-sec sleep windows.                   |
| Wake after sleep onset (WASO) | The amount of wake time spent after the sleep onset during the longest sleep window.                                                                                                        |
| Sleep efficiency (SE)         | SE for sleep window after device-detected sleep onset: $\frac{\text{Overnight sleep duration}}{\text{time in bed}}$                                                                         |
| REM duration                  | The total time spent in the REM stage.                                                                                                                                                      |
| REM ratio                     | $\frac{\text{REM duration}}{\text{TSD}}$                                                                                                                                                    |
| NREM duration                 | The total time spent in the NREM I, II, and III stages.                                                                                                                                     |
| NREM ratio                    | $\frac{\text{NREM duration}}{\text{TSD}}$                                                                                                                                                   |

Supplementary Table 5: **Code table for UK Biobank variables used in the study.**

| Variable                                      | Code name |
|-----------------------------------------------|-----------|
| Month of birth                                | p52       |
| Year of birth                                 | p34       |
| Device wear time                              | p90010    |
| Sex                                           | p31       |
| Ethnicity                                     | p21000    |
| Smoking status                                | p20116    |
| Alcohol consumption                           | p1558     |
| Education qualification                       | p6138     |
| Body mass index                               | p21001    |
| Employment status                             | p6142     |
| Overall health rating                         | p2178     |
| Self-reported total sleep duration            | p1160     |
| Townsend Deprivation Index                    | p189      |
| Overall accelerometry average                 | p90012    |
| Self-reported trouble falling/ staying asleep | p1200     |

770 The UK Biobank variable codes are shown in Supplementary Table 5. We used the  
771 month of birth (p52) and year of birth (p34) along with device wear time (p90010)  
772 to compute the age at wear time. Participants were asked about their insomnia  
773 symptoms history (p1200) by “Do you have trouble falling asleep at night or do you  
774 wake up in the middle of the night?”. Four responses were possible: “never/rarely”,  
775 “sometimes”, “usually”, and “prefer not to answer”.

### 776 1.3.1. Sleep and all-cause mortality

777 The relationship between machine learning-derived sleep architecture estimates  
778 and all-cause mortality was assessed using association analyses. The main analysis  
779 split the participants into six groups stratified by sleep efficiency cut-off with clinical



780 relevance. Then, five groups were created based on exact hour cut-offs in line with  
781 sleep recommendation guidelines for overnight sleep duration [14]. Four groups were  
782 created based on percentage cut-offs of clinical relevance for sleep efficiency [15]. In  
783 the sensitivity analysis, seven sleep groups were created on exact hour cut-offs to  
784 capture the variations in participants with lower and higher sleep durations.

785 Mortality was determined using death registry data (obtained by UK Biobank  
786 from NHS Digital for participants in England and Wales and from the NHS Central  
787 Register, National Records of Scotland, for participants in Scotland). For survival  
788 analyses, participants were censored at the earliest of UK Biobank's record censor-  
789 ing date for mortality data (2021-09-30 for participants in England and Wales and  
790 2021-10-31 for participants in Scotland, with country assigned based on baseline as-  
791 sessment centre) and a record of loss to linked health record follow-up (field 191; 2  
792 participants only).

793 In addition to the exclusions described for the analyses above, for prospective  
794 analyses for incident mortality we further excluded the participants if they had a  
795 prior hospitalisation for restless syndrome, any cardiovascular disease or cancer (a  
796 hospital episode with primary diagnosis G473, I00-I99 or C00-C99).

797 Models used age as the timescale, and the main analysis was adjusted for sex  
798 (male/female), ethnicity (white/non-white), Townsend Deprivation Index of baseline  
799 address (split by quarter in the study population), educational qualifications (school  
800 leaver, further education, higher education), smoking status (never smoker, ex-  
801 smoker, current smoker), alcohol consumption (never, <3 times/week, 3+ times/week),  
802 and overall activity (measured in milli-gravity units). An additional analysis further

803 adjusted for BMI (categorised as  $<18.5$  kg/m<sup>2</sup>, 18.5-24.9 kg/m<sup>2</sup>, 25.0-29.9 kg/m<sup>2</sup>,  
804 30+ kg/m<sup>2</sup>). See Supplementary Table 5 for UK Biobank fields).

805 Results are presented with their 95% confidence intervals. The Floating Absolute  
806 Risk approach was used to calculate confidence intervals for the estimate in each  
807 group, without contrast to a reference group [16, 17, 18].

808 In statistical testing using the Grambsch-Therneau test with the Kaplan-Meier  
809 transformation, there was some evidence that the joint associations of overnight  
810 sleep duration and sleep efficiency with incident mortality violated the proportional  
811 hazards assumption (with age as the timescale). However, assessing associations  
812 at younger ( $< 65$  years) and older ( $\geq 65$  years) ages did not suggest substantially  
813 differing associations by age, and so the overall hazard ratios are presented.

814 *1.3.2. Reliability assessment for device wear time exclusion criterion*

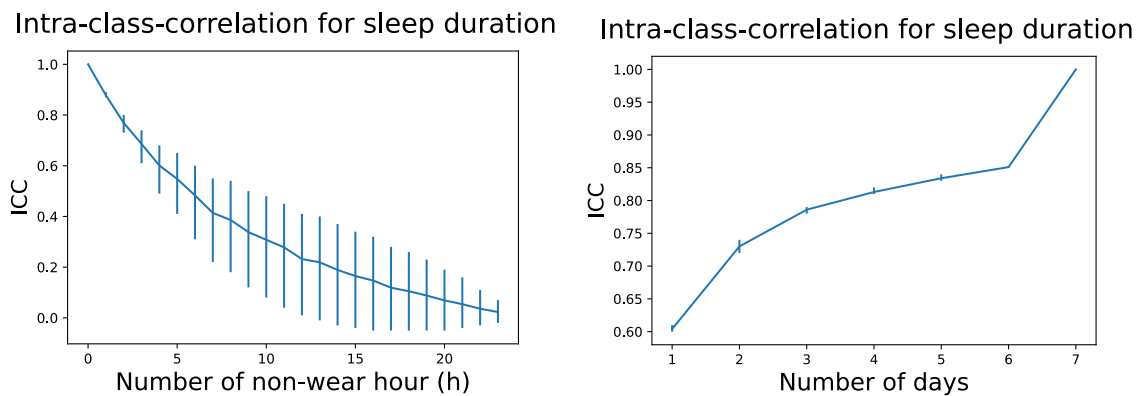

Supplementary Figure 2: **How the intraclass correlation coefficient (ICC) changes with respect to the non-wear hours (h) (left) and the number of wear days (right) in a reliability simulation using data from 27,870 participants that had zero non-wear time across a seven-day period.** Mean and 95% confidence intervals are plotted.

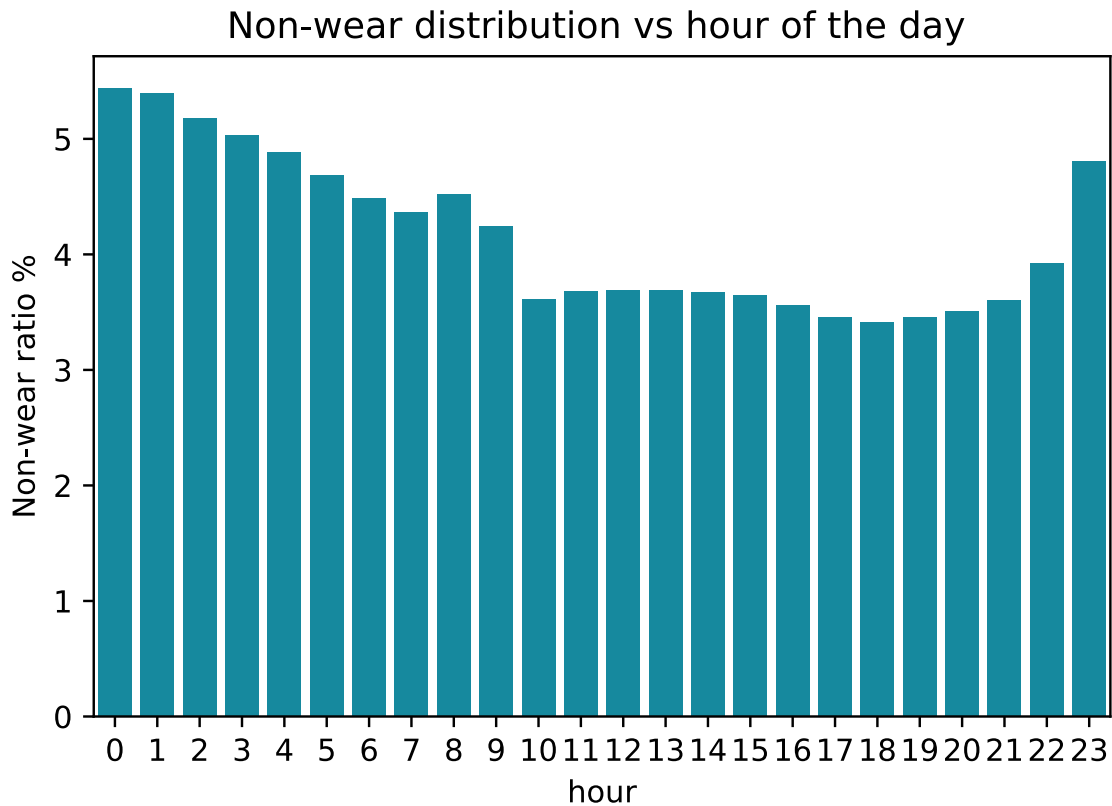

Supplementary Figure 3: **The distribution of non-wear time for all the participants from the UK Biobank.**

815 We needed to discard participants with too much non-wear time to obtain a stable  
 816 sleep duration estimate. Ideally, all the participants would have perfect seven-day  
 817 device wear, which was not the case. Thus, we needed to determine the minimum  
 818 wear time for seven days so that there is a high agreement between sleep duration  
 819 computed for participants with perfect data and those computed for participants  
 820 with missing data. To do this, we first selected a subset of 27,870 participants who  
 821 did not have any non-wear time during the seven-day window. Then, we simulated  
 822 the missing data by randomly removing one hour from each day or one whole day of

823 data from each week from their recordings. We increased the amount of simulated  
824 missing data step-wise until all the data was removed. Then, we compared weekly  
825 mean sleep durations computed on data before and after removing the simulated  
826 missing periods.

827 We used the intraclass correlation coefficient (ICC) to determine the acceptable  
828 missing time threshold. We selected two-way random-effects, single rater with an ab-  
829 solute agreement, ICC2, to reflect the reliability of our sleep duration measurement  
830 if we have missing data in the measurements [19]. Supplementary Figure 2 depicts  
831 the ICC mean and 95% confidence intervals for the missing non-wear hour (Supple-  
832 mentary Figure 2 Left)and missing days (Supplementary Figure 2 Right). We used  
833 an ICC of 0.75 threshold when deciding the acceptable device wear range. According  
834 to the 0.75 cut-off, a maximum of two non-wear hours per day and a minimum of  
835 three days per week are suitable for obtaining stable measurements of sleep duration.

836 **2. Supplementary results**

837 *2.1. Model performance*

Supplementary Table 6: **Subject-wise sleep stage classification for benchmark models using internal validation datasets with the Raine Study and the Newcastle cohort:**

The random forest model was trained using hand-crafted features. SleepNet is the deep recurrent network without pre-training. SleepNet-SSL is the network pre-trained using self-supervision. Five-fold subject-wise performance metrics (mean  $\pm$  SD) are reported using the internal validation data. REM: rapid-eye-movement sleep, NREM: non-rapid-eye-movement sleep, Kappa score:  $\kappa$ .

| Model                     | Sleep versus Wake |                   |                   | Wake versus REM versus NREM |                   |                   |
|---------------------------|-------------------|-------------------|-------------------|-----------------------------|-------------------|-------------------|
|                           | $\kappa$          | Accuracy          | F1                | $\kappa$                    | Accuracy          | F1                |
| Random forest<br>[13, 12] | 0.489 $\pm$ 0.187 | 0.769 $\pm$ 0.099 | 0.737 $\pm$ 0.103 | 0.304 $\pm$ 0.144           | 0.516 $\pm$ 0.069 | 0.469 $\pm$ 0.071 |
| SleepNet                  | 0.467 $\pm$ 0.193 | 0.765 $\pm$ 0.101 | 0.726 $\pm$ 0.105 | 0.307 $\pm$ 0.155           | 0.576 $\pm$ 0.108 | 0.530 $\pm$ 0.102 |
| SleepNet-SSL              | 0.514 $\pm$ 0.186 | 0.778 $\pm$ 0.096 | 0.749 $\pm$ 0.103 | 0.374 $\pm$ 0.159           | 0.620 $\pm$ 0.112 | 0.574 $\pm$ 0.111 |

838 Supplementary Table 6 shows the model performance comparison between the  
 839 random forest model that used hand-crafted features and our proposed SleepNet  
 840 on the internal validation. SleepNet pre-trained with self-supervision had the best  
 841 performance in both the two-class ( $\kappa = 0.514 \pm 0.186$ ) and three-class settings ( $\kappa =$   
 842  $0.374 \pm 0.159$ ). In addition, the area under the receiver operating characteristic  
 843 curve for the best SleepNet model is 0.88 for the two-class setting and 0.81 for the  
 844 three-class setting (Supplementary Figure 4).

Supplementary Table 7: **Subject-wise performance sleep classification validation using our best-performing model:** All the performance is reported within period in bed. Cohort-specific and pooled performance (Kappa ( $\kappa$ ), balanced accuracy, and F1) are shown for both internal and external validation. The pooled performance is calculated by combining all the participants from different datasets. REM: rapid-eye-movement sleep; NREM: non-rapid-eye-movement sleep.

| Dataset                | Sleep versus Wake |             |             | Wake versus REM versus NREM |             |             |
|------------------------|-------------------|-------------|-------------|-----------------------------|-------------|-------------|
|                        | $\kappa$          | Accuracy    | F1          | $\kappa$                    | Accuracy    | F1          |
| Internal validation    |                   |             |             |                             |             |             |
| Raine Gen1             | 0.553±0.169       | 0.784±0.093 | 0.769±0.097 | 0.382±0.155                 | 0.622±0.109 | 0.583±0.108 |
| Raine Gen2             | 0.434±0.191       | 0.767±0.099 | 0.709±0.103 | 0.359±0.166                 | 0.623±0.115 | 0.561±0.113 |
| Newcastle              | 0.390±0.212       | 0.713±0.109 | 0.676±0.124 | 0.305±0.149                 | 0.513±0.103 | 0.471±0.115 |
| <b>Pooled internal</b> | 0.514±0.186       | 0.778±0.096 | 0.749±0.103 | 0.374±0.159                 | 0.620±0.112 | 0.574±0.111 |
| External Validation    |                   |             |             |                             |             |             |
| Leicester              | 0.244±0.141       | 0.659±0.078 | 0.609±0.083 | 0.199±0.129                 | 0.494±0.085 | 0.456±0.085 |
| Pennsylvania           | 0.467±0.218       | 0.819±0.115 | 0.721±0.120 | 0.328±0.179                 | 0.597±0.099 | 0.536±0.106 |
| <b>Pooled external</b> | 0.341±0.210       | 0.728±0.124 | 0.658±0.115 | 0.255±0.166                 | 0.539±0.104 | 0.491±0.103 |

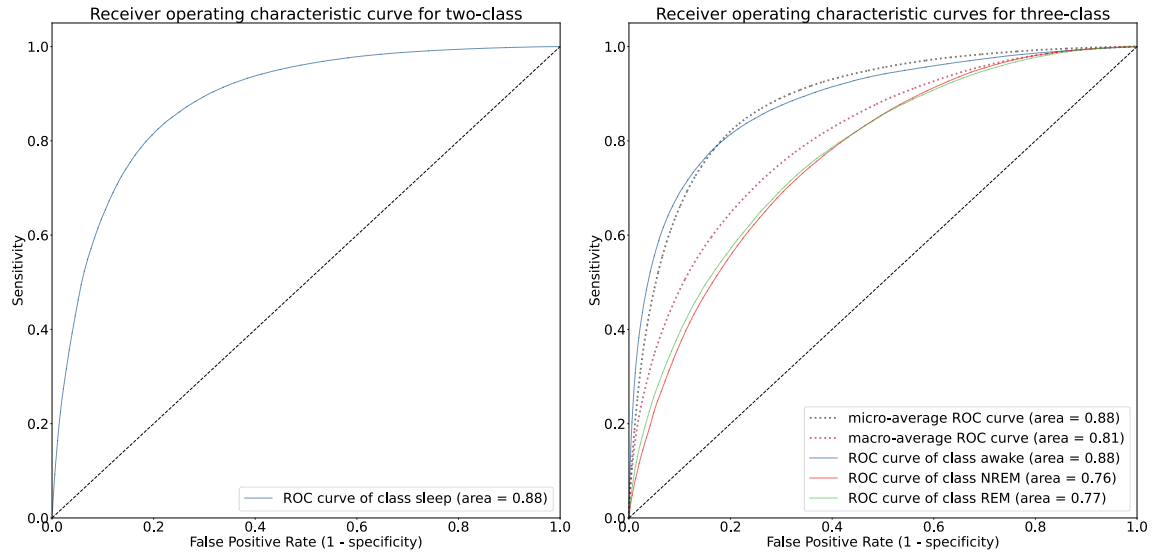

Supplementary Figure 4: **Receiver operating characteristics curves for two-class (wake/sleep) and three-class (wake/REM/NREM) settings on the internal validation dataset using our best performing model self-supervised SleepNet.** REM: rapid-eye-movement sleep, NREM: non-rapid-eye-movement sleep.

Supplementary Table 8: **Model characteristics on the internal validation datasets (wake versus sleep)**: subject-wise performance metrics (mean  $\pm$  SD) are reported using the internal validation data. Sen: sensitivity, Spe: specificity. Wake is the negative class and the sleep is the positive class when calculating model performance.

| Subgroups                  | Wake versus Sleep |                 |                 |            |                 |                 |           |                 |                 |
|----------------------------|-------------------|-----------------|-----------------|------------|-----------------|-----------------|-----------|-----------------|-----------------|
|                            | Raine Gen1        |                 |                 | Raine Gen2 |                 |                 | Newcastle |                 |                 |
|                            | n                 | Sen (%)         | Spe (%)         | n          | Sen (%)         | Spe (%)         | n         | Sen (%)         | Spe (%)         |
| Sex                        |                   |                 |                 |            |                 |                 |           |                 |                 |
| Male                       | 341               | 90.9 $\pm$ 12.3 | 63.7 $\pm$ 21.3 | 151        | 85.4 $\pm$ 11.4 | 66.3 $\pm$ 21.4 | 15        | 72.1 $\pm$ 30.1 | 64.2 $\pm$ 27.4 |
| Femal                      | 422               | 91.5 $\pm$ 10.2 | 67.2 $\pm$ 21.4 | 177        | 87.2 $\pm$ 9.5  | 67.0 $\pm$ 20.7 | 7         | 77.0 $\pm$ 18.2 | 79.0 $\pm$ 10.2 |
| Body Mass Index (BMI)      |                   |                 |                 |            |                 |                 |           |                 |                 |
| < 25                       | 217               | 92.4 $\pm$ 9.9  | 63.4 $\pm$ 22.5 | 211        | 86.6 $\pm$ 10.5 | 66.5 $\pm$ 20.5 | -         | -               | -               |
| 25 - 29.9                  | 298               | 92.0 $\pm$ 9.5  | 64.8 $\pm$ 21.1 | 65         | 88.6 $\pm$ 9.5  | 67.3 $\pm$ 22.8 | -         | -               | -               |
| >30                        | 247               | 89.2 $\pm$ 13.7 | 68.4 $\pm$ 20.5 | 52         | 82.5 $\pm$ 10.8 | 66.6 $\pm$ 21.1 | -         | -               | -               |
| Apnea Hypopnea Index (AHI) |                   |                 |                 |            |                 |                 |           |                 |                 |
| < 5                        | 182               | 93.7 $\pm$ 6.9  | 66.3 $\pm$ 21.0 | 204        | 86.3 $\pm$ 10.6 | 68.4 $\pm$ 21.0 | -         | -               | -               |
| 5 - 14.9                   | 333               | 91.9 $\pm$ 9.2  | 66.6 $\pm$ 21.5 | 90         | 86.9 $\pm$ 10.2 | 62.8 $\pm$ 22.3 | -         | -               | -               |
| 15 - 29.9                  | 139               | 89.6 $\pm$ 12.2 | 64.4 $\pm$ 21.8 | 22         | 87.5 $\pm$ 9.9  | 65.0 $\pm$ 16.3 | -         | -               | -               |
| $\geq$ 30                  | 105               | 88.1 $\pm$ 16.8 | 62.4 $\pm$ 21.1 | 12         | 81.4 $\pm$ 11.0 | 70.1 $\pm$ 16.3 | -         | -               | -               |
| Has sleep disorder(s)?     |                   |                 |                 |            |                 |                 |           |                 |                 |
| Yes                        | 145               | 90.0 $\pm$ 13.7 | 64.2 $\pm$ 20.5 | 69         | 86.0 $\pm$ 10.6 | 66.4 $\pm$ 21.9 | 15        | 68.8 $\pm$ 29.5 | 69.6 $\pm$ 26.8 |
| No                         | 618               | 91.5 $\pm$ 10.5 | 65.9 $\pm$ 21.6 | 259        | 86.4 $\pm$ 10.4 | 66.7 $\pm$ 20.8 | 7         | 84.1 $\pm$ 16.1 | 67.4 $\pm$ 18.8 |

Supplementary Table 9: **Model characteristics on the internal validation datasets (wake versus REM versus NREM):** subject-wise performance metrics (mean  $\pm$  SD) are reported using the internal validation data. REM: rapid-eye-movement, NREM: non-rapid-eye-movement, Kappa score:  $\kappa$ .

| Subgroups                         | Wake versus REM versus NREM |                   |            |                   |           |                   |
|-----------------------------------|-----------------------------|-------------------|------------|-------------------|-----------|-------------------|
|                                   | Raine Gen1                  |                   | Raine Gen2 |                   | Newcastle |                   |
|                                   | n                           | $\kappa$          | n          | $\kappa$          | n         | $\kappa$          |
| <b>Sex</b>                        |                             |                   |            |                   |           |                   |
| Male                              | 341                         | 0.378 $\pm$ 0.149 | 151        | 0.359 $\pm$ 0.172 | 15        | 0.273 $\pm$ 0.144 |
| Female                            | 422                         | 0.385 $\pm$ 0.160 | 177        | 0.349 $\pm$ 0.159 | 7         | 0.374 $\pm$ 0.160 |
| <b>Body Mass Index (BMI)</b>      |                             |                   |            |                   |           |                   |
| < 25                              | 217                         | 0.363 $\pm$ 0.163 | 211        | 0.351 $\pm$ 0.161 | -         | -                 |
| 25 - 29.9                         | 298                         | 0.389 $\pm$ 0.143 | 65         | 0.379 $\pm$ 0.161 | -         | -                 |
| >30                               | 247                         | 0.390 $\pm$ 0.162 | 52         | 0.334 $\pm$ 0.183 | -         | -                 |
| <b>Apnea Hypopnea Index (AHI)</b> |                             |                   |            |                   |           |                   |
| < 5                               | 199                         | 0.397 $\pm$ 0.163 | 338        | 0.349 $\pm$ 0.156 | -         | -                 |
| 5 - 14.9                          | 349                         | 0.390 $\pm$ 0.148 | 146        | 0.317 $\pm$ 0.158 | -         | -                 |
| 15 - 29.9                         | 150                         | 0.395 $\pm$ 0.153 | 39         | 0.355 $\pm$ 0.166 | -         | -                 |
| $\geq$ 30                         | 114                         | 0.369 $\pm$ 0.143 | 14         | 0.273 $\pm$ 0.139 | -         | -                 |
| <b>Has sleep disorder(s)?</b>     |                             |                   |            |                   |           |                   |
| Yes                               | 145                         | 0.388 $\pm$ 0.164 | 69         | 0.375 $\pm$ 0.170 | 15        | 0.275 $\pm$ 0.145 |
| No                                | 618                         | 0.381 $\pm$ 0.153 | 259        | 0.348 $\pm$ 0.163 | 7         | 0.369 $\pm$ 0.160 |



Supplementary Table 10: **Model characteristics on the internal validation datasets (wake versus REM versus NREM I, II, III):** subject-wise performance metrics (mean  $\pm$  SD) are reported using the internal validation data. REM: rapid-eye-movement, NREM: non-rapid-eye-movement, Kappa score:  $\kappa$ .

| Subgroups                  | Wake versus REM versus NREM I, II, III |                   |            |                   |           |                   |
|----------------------------|----------------------------------------|-------------------|------------|-------------------|-----------|-------------------|
|                            | Raine Gen1                             |                   | Raine Gen2 |                   | Newcastle |                   |
|                            | n                                      | $\kappa$          | n          | $\kappa$          | n         | $\kappa$          |
| Sex                        |                                        |                   |            |                   |           |                   |
| Male                       | 341                                    | 0.294 $\pm$ 0.106 | 151        | 0.295 $\pm$ 0.132 | 15        | 0.205 $\pm$ 0.119 |
| Female                     | 422                                    | 0.313 $\pm$ 0.117 | 177        | 0.291 $\pm$ 0.114 | 7         | 0.261 $\pm$ 0.106 |
| Body Mass Index (BMI)      |                                        |                   |            |                   |           |                   |
| < 25                       | 217                                    | 0.295 $\pm$ 0.122 | 211        | 0.292 $\pm$ 0.115 | -         | -                 |
| 25 - 29.9                  | 298                                    | 0.312 $\pm$ 0.105 | 65         | 0.312 $\pm$ 0.132 | -         | -                 |
| >30                        | 247                                    | 0.304 $\pm$ 0.113 | 52         | 0.272 $\pm$ 0.136 | -         | -                 |
| Apnea Hypopnea Index (AHI) |                                        |                   |            |                   |           |                   |
| < 5                        | 182                                    | 0.313 $\pm$ 0.111 | 204        | 0.298 $\pm$ 0.118 | -         | -                 |
| 5 - 14.9                   | 333                                    | 0.312 $\pm$ 0.111 | 90         | 0.275 $\pm$ 0.133 | -         | -                 |
| 15 - 29.9                  | 139                                    | 0.308 $\pm$ 0.110 | 22         | 0.329 $\pm$ 0.120 | -         | -                 |
| $\geq$ 30                  | 105                                    | 0.269 $\pm$ 0.112 | 12         | 0.275 $\pm$ 0.118 | -         | -                 |
| Has sleep disorder(s)?     |                                        |                   |            |                   |           |                   |
| Yes                        | 145                                    | 0.290 $\pm$ 0.123 | 69         | 0.311 $\pm$ 0.127 | 15        | 0.210 $\pm$ 0.120 |
| No                         | 618                                    | 0.308 $\pm$ 0.110 | 259        | 0.288 $\pm$ 0.121 | 7         | 0.249 $\pm$ 0.111 |



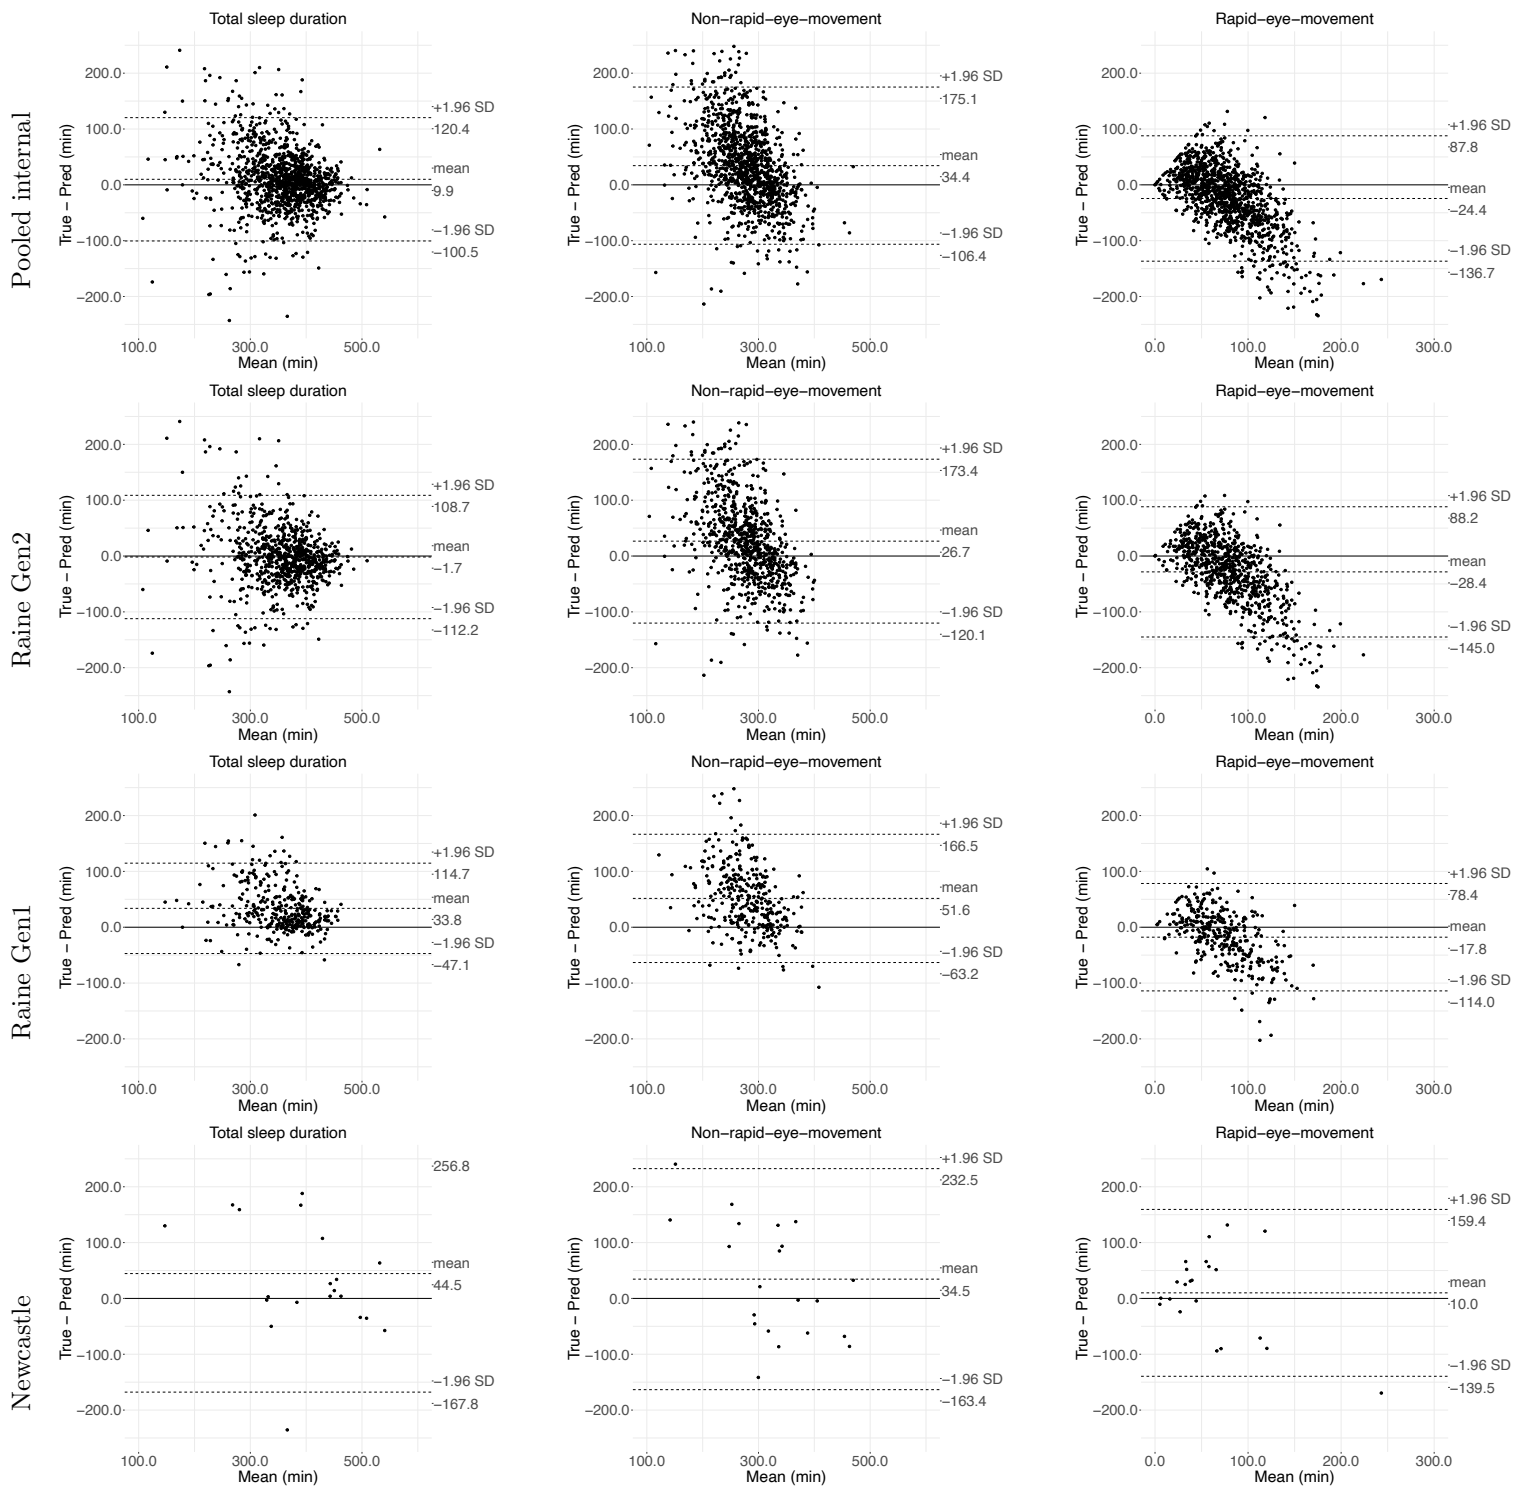

Supplementary Figure 5: Agreement assessment via Bland-Altman plots for internal validation: total sleep duration (TSD), non-rapid-eye-movement sleep (NREM), and rapid-eye-movement sleep (REM).

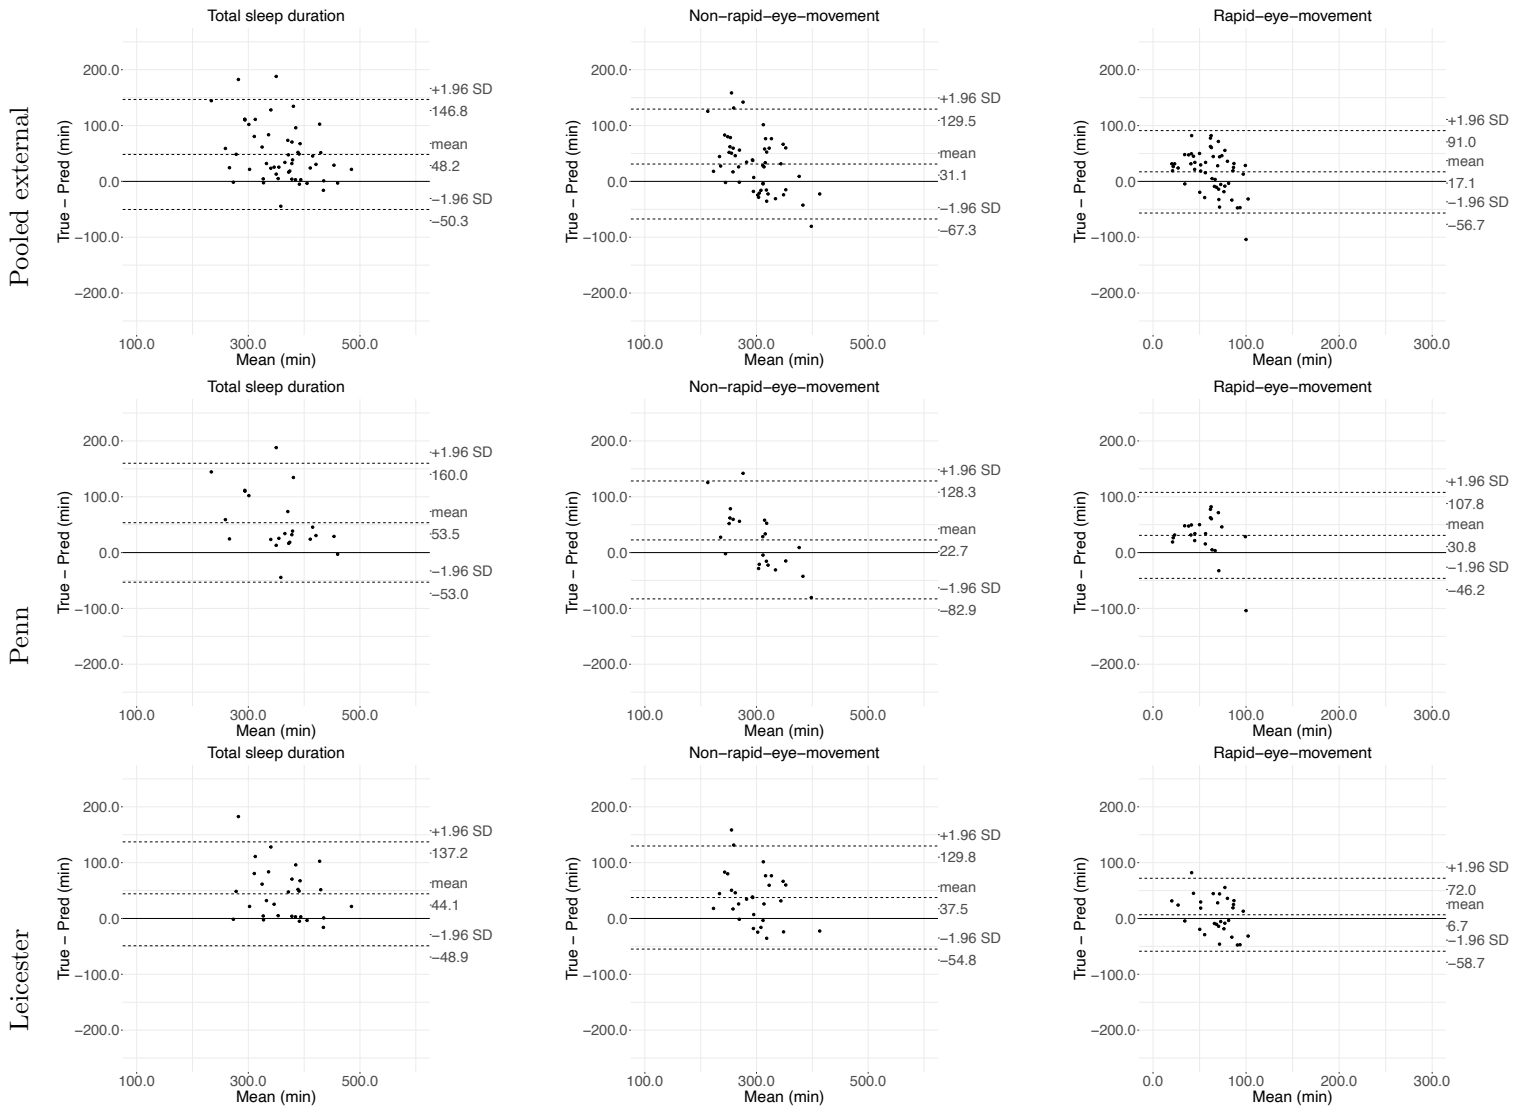

Supplementary Figure 6: Agreement assessment via Bland-Altman plots for external validation: total sleep duration, wake after sleep onset (WASO), non-rapid-eye-movement sleep (NREM), and rapid-eye-movement sleep (REM).

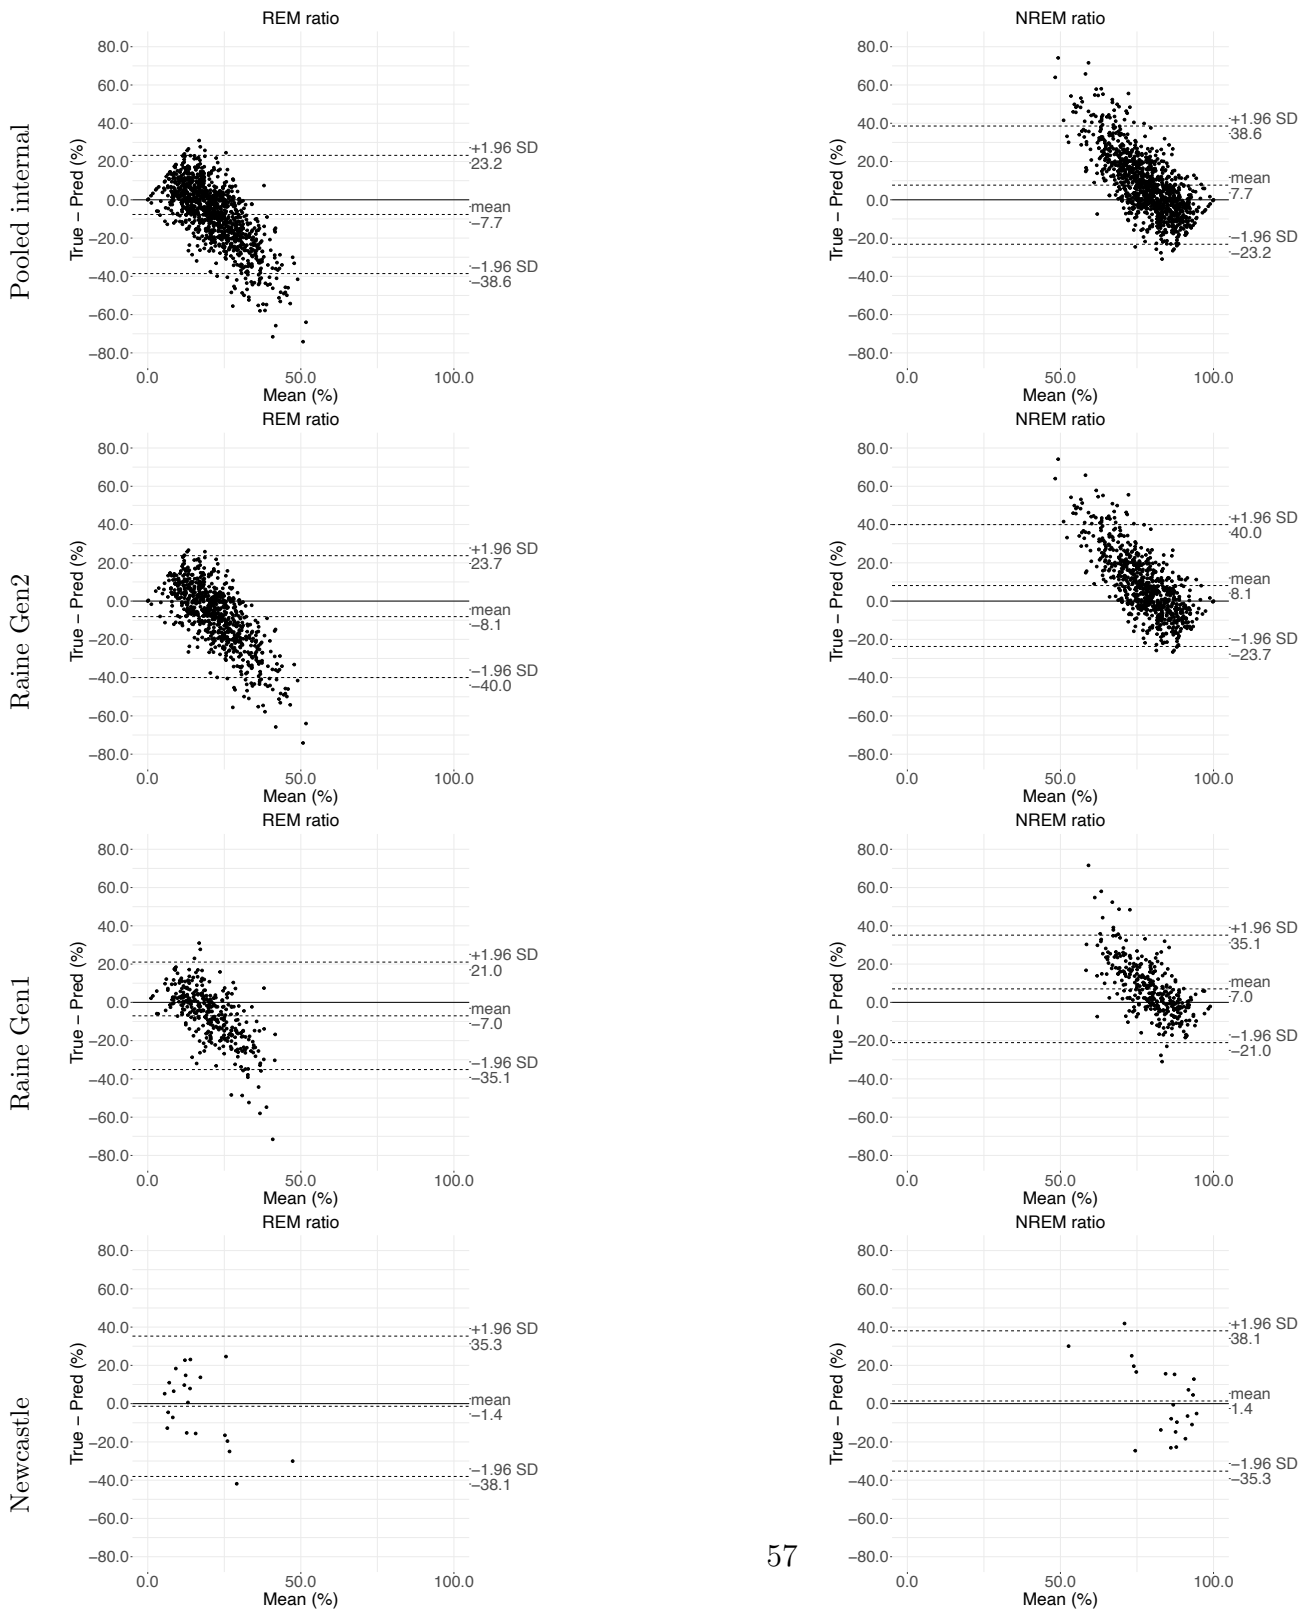

Supplementary Figure 7: Agreement assessment via Bland-Altman plots for internal validation: non-rapid-eye-movement sleep (NREM) ratio, and rapid-eye-movement sleep (REM) ratio.

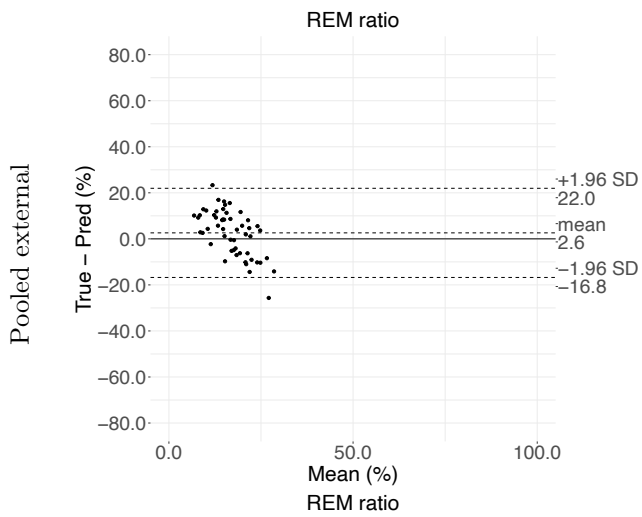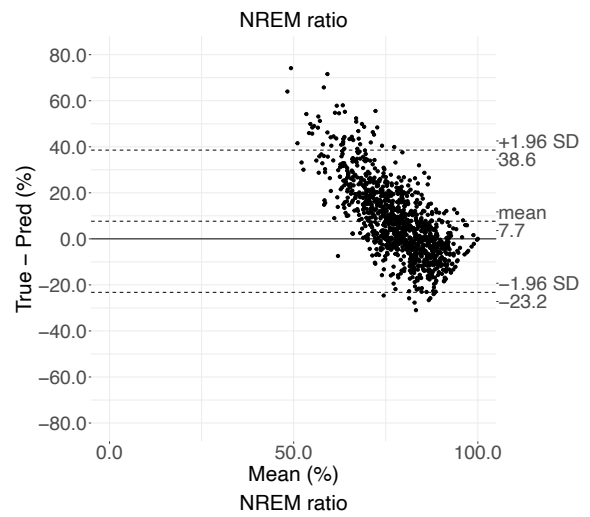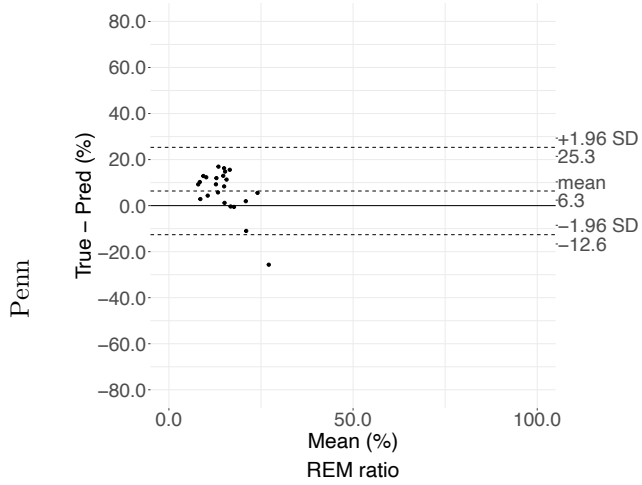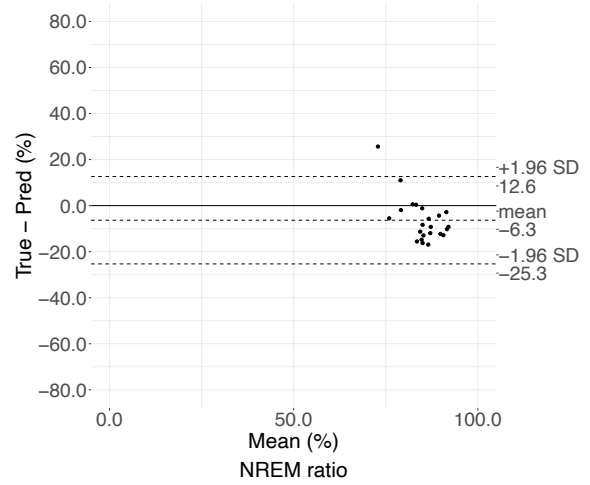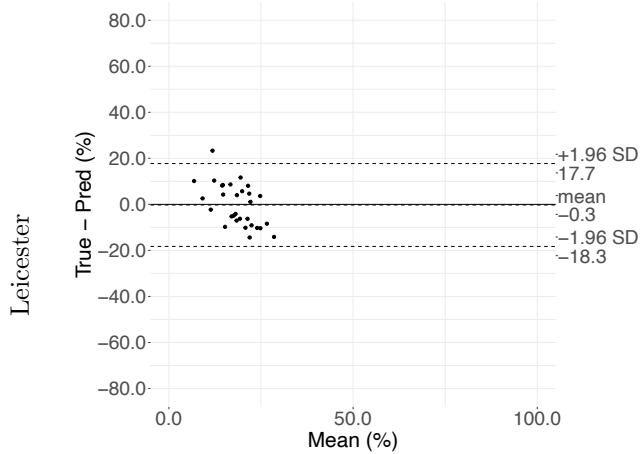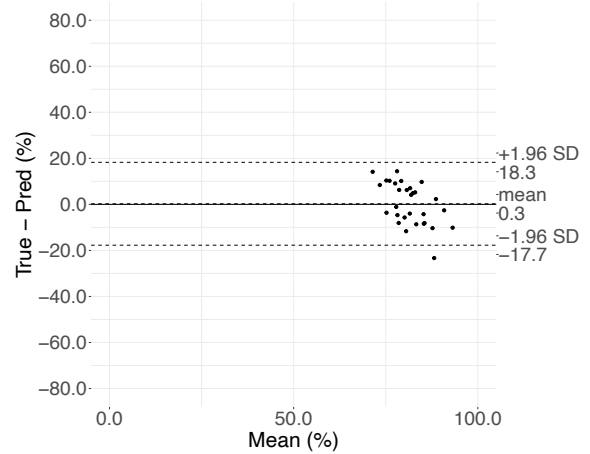

Supplementary Figure 8: Agreement assessment via Bland-Altman plots for external validation: non-rapid-eye-movement sleep (NREM) ratio, and rapid-eye-movement sleep (REM) ratio.

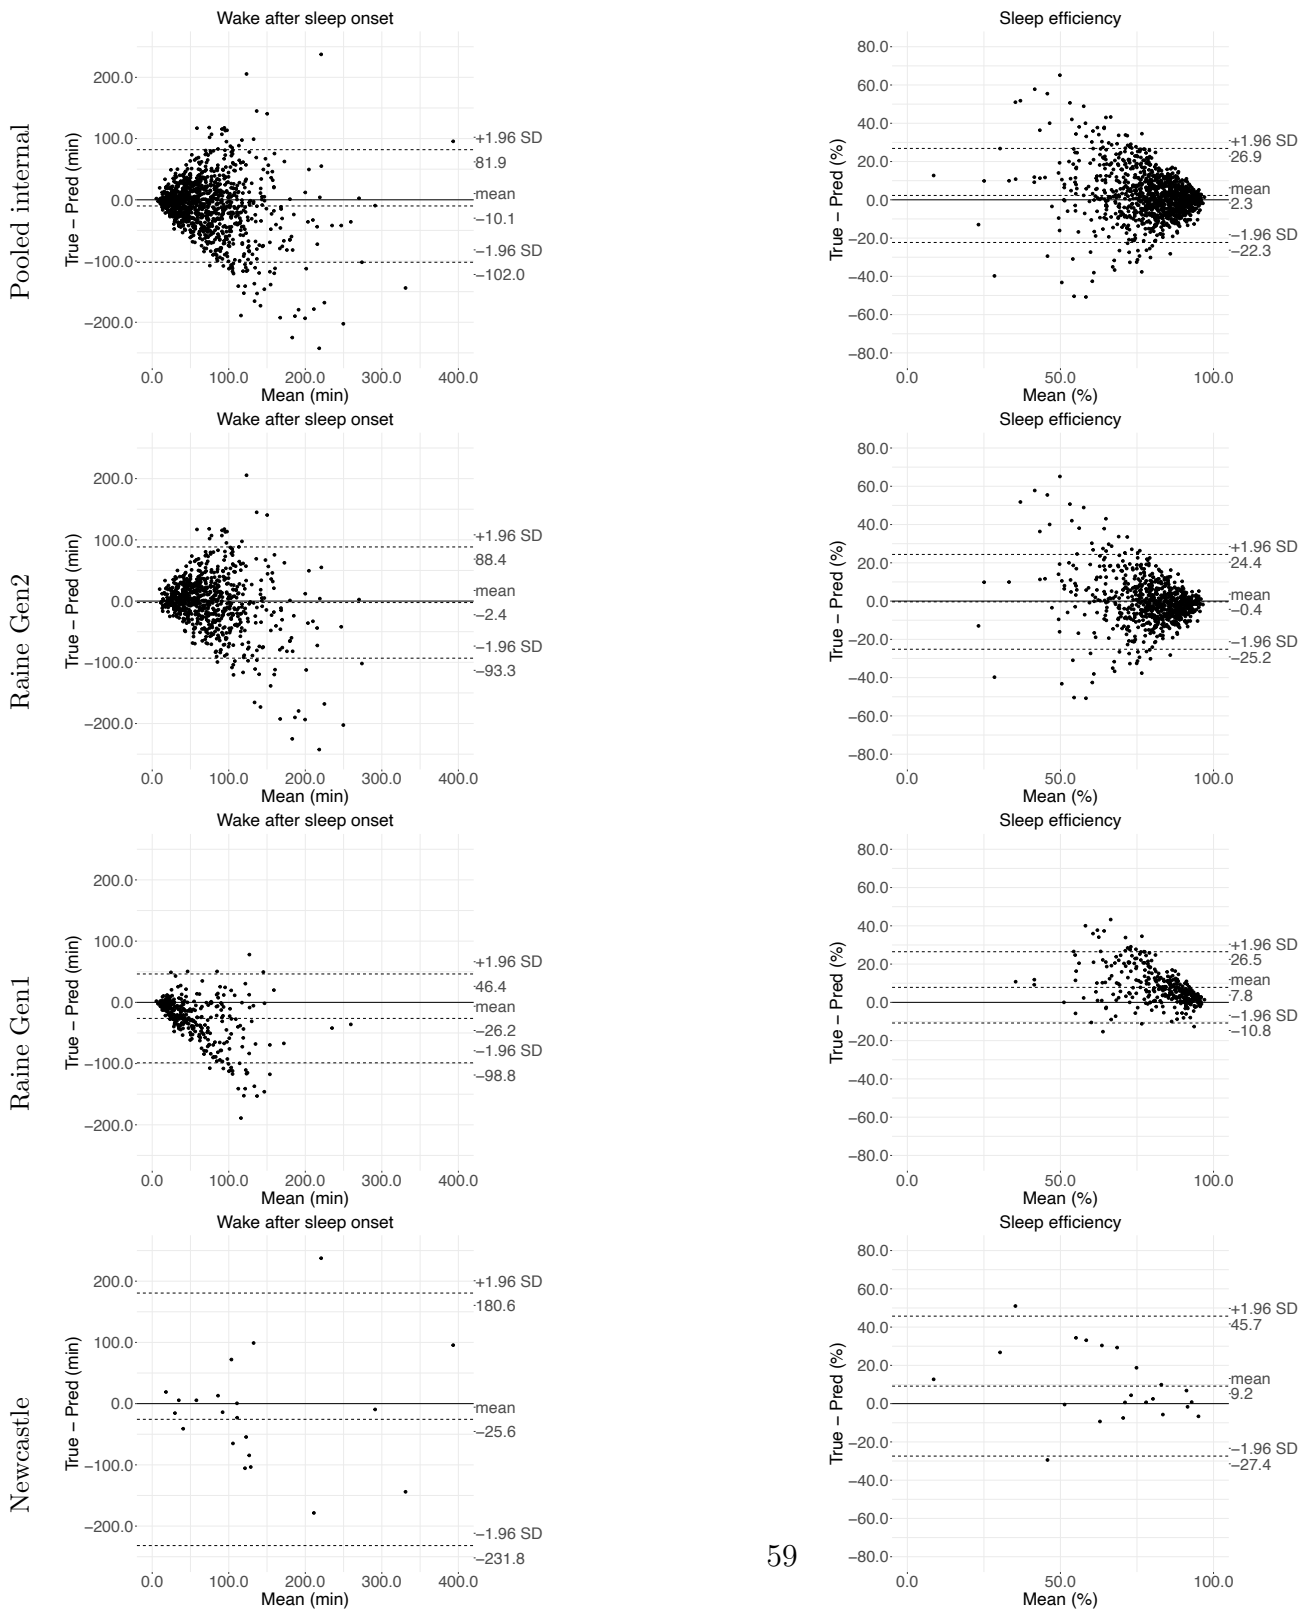

Supplementary Figure 9: Agreement assessment via Bland-Altman plots for internal validation: wake after sleep onset (WASO), and sleep efficiency (SE).

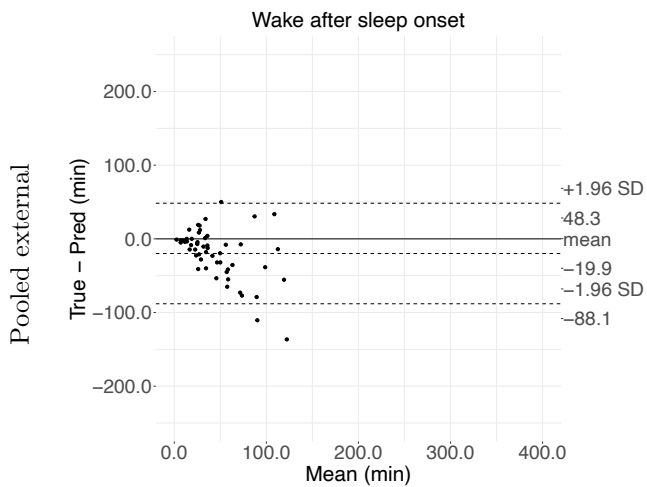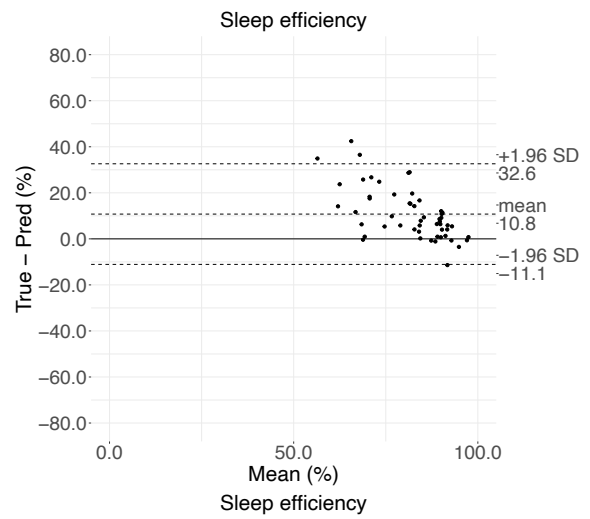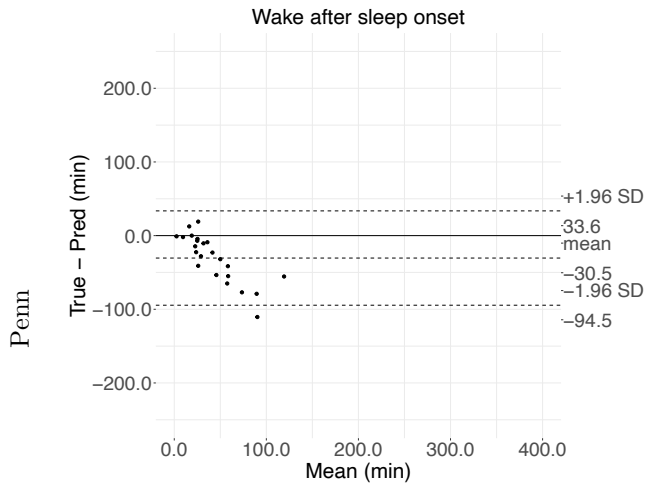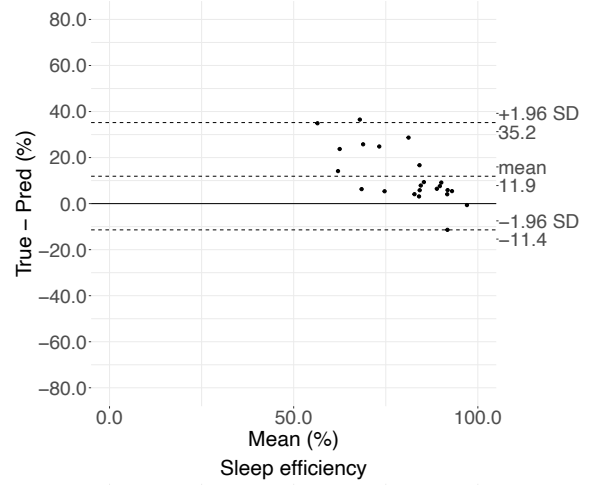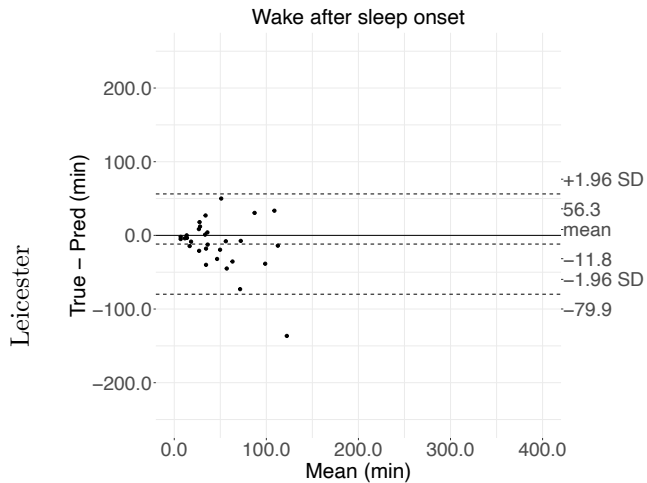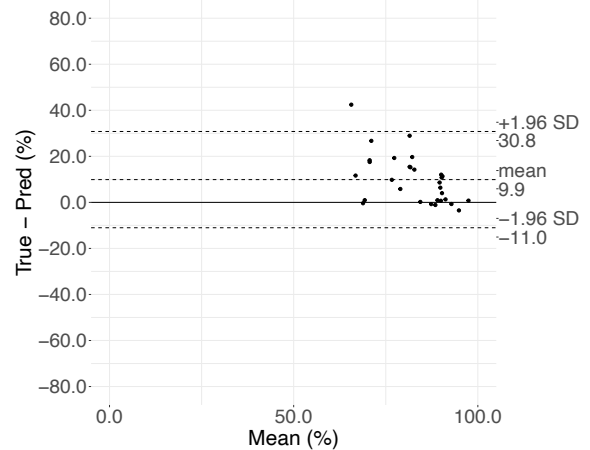

Supplementary Figure 10: Agreement assessment via Bland-Altman plots for internal validation: wake after sleep onset (WASO), and sleep efficiency (SE).



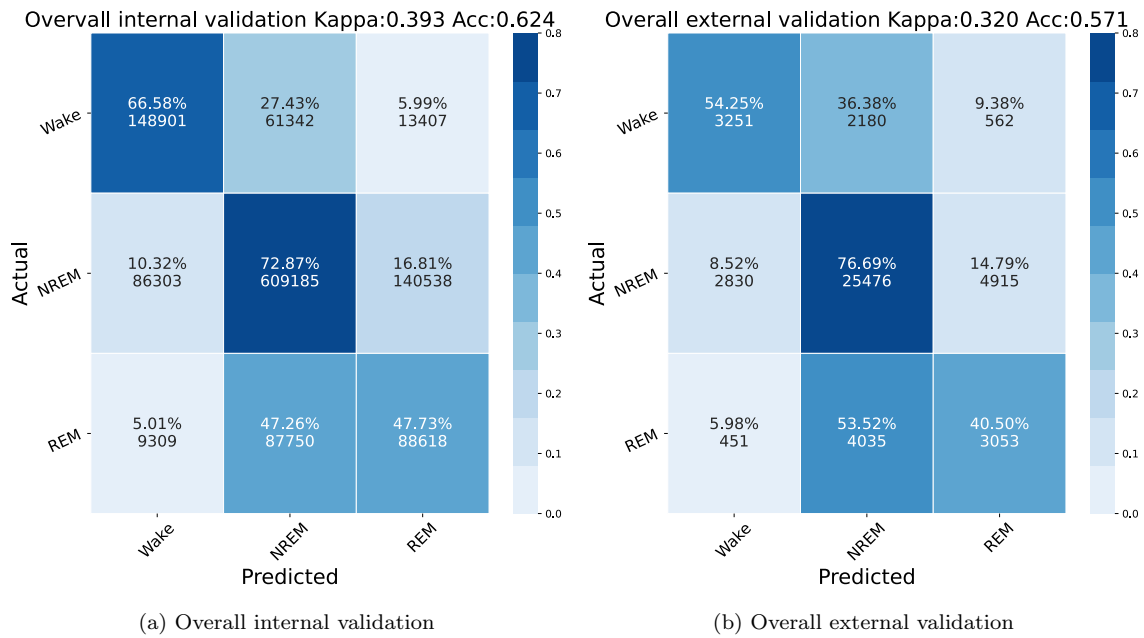

Supplementary Figure 11: **Three class classification (wake/REM/NREM) confusion matrix**: epoch-to-epoch Kappa and balanced accuracies are shown. The number of predictions and proportion ratios are shown for each pair of ground-truth and prediction class. REM: rapid-eye-movement sleep; NREM: non-rapid-eye-movement sleep.

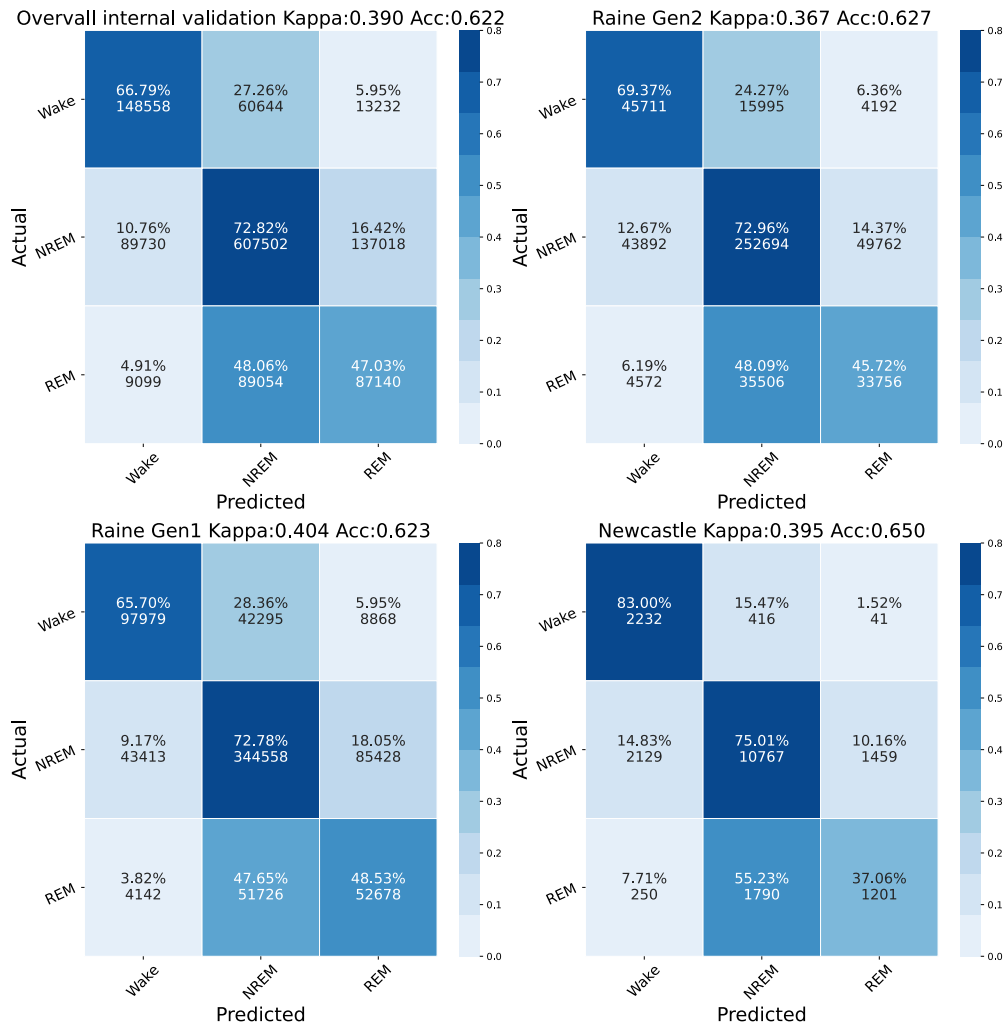

Supplementary Figure 12: **Three-class sleep staging (wake/REM/NREM) for internal validation: epoch-to-epoch Kappa and balanced accuracies are shown.** The number of predictions and proportion ratios are shown for each pair of ground-truth and prediction class. REM: rapid-eye-movement sleep; NREM: non-rapid-eye-movement sleep.

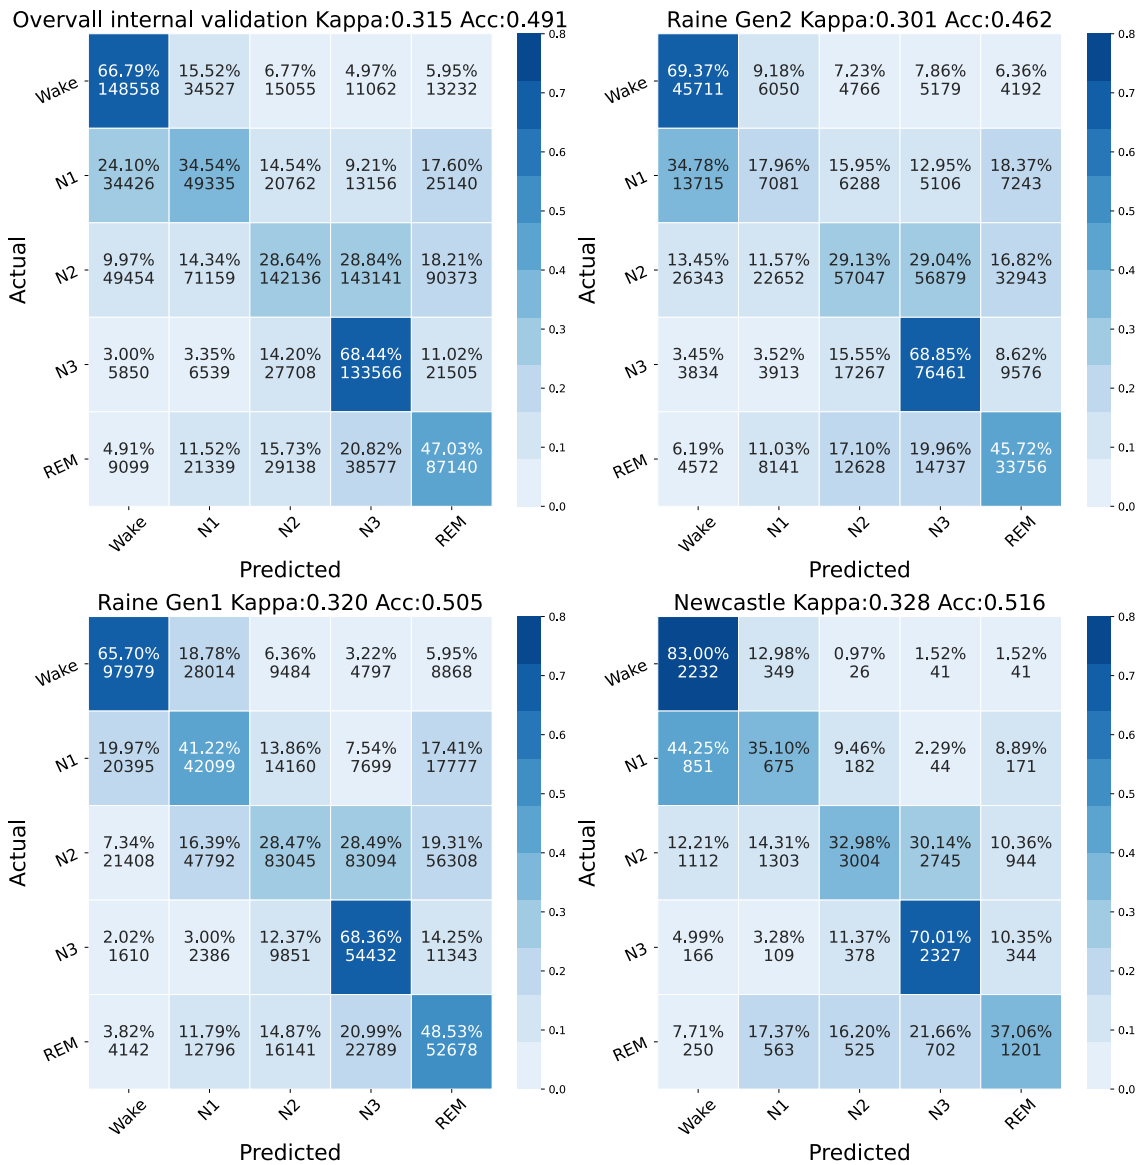

Supplementary Figure 13: **Five-class sleep staging (wake/REM/N1/N2/N3) for internal validation: epoch-to-epoch kappa and balanced accuracies are shown.** The number of predictions and proportion ratios are shown for each pair of ground-truth and prediction class. REM: rapid-eye-movement sleep, N1, N2, N3: non-rapid-eye-movement sleep 1, 2, 3.

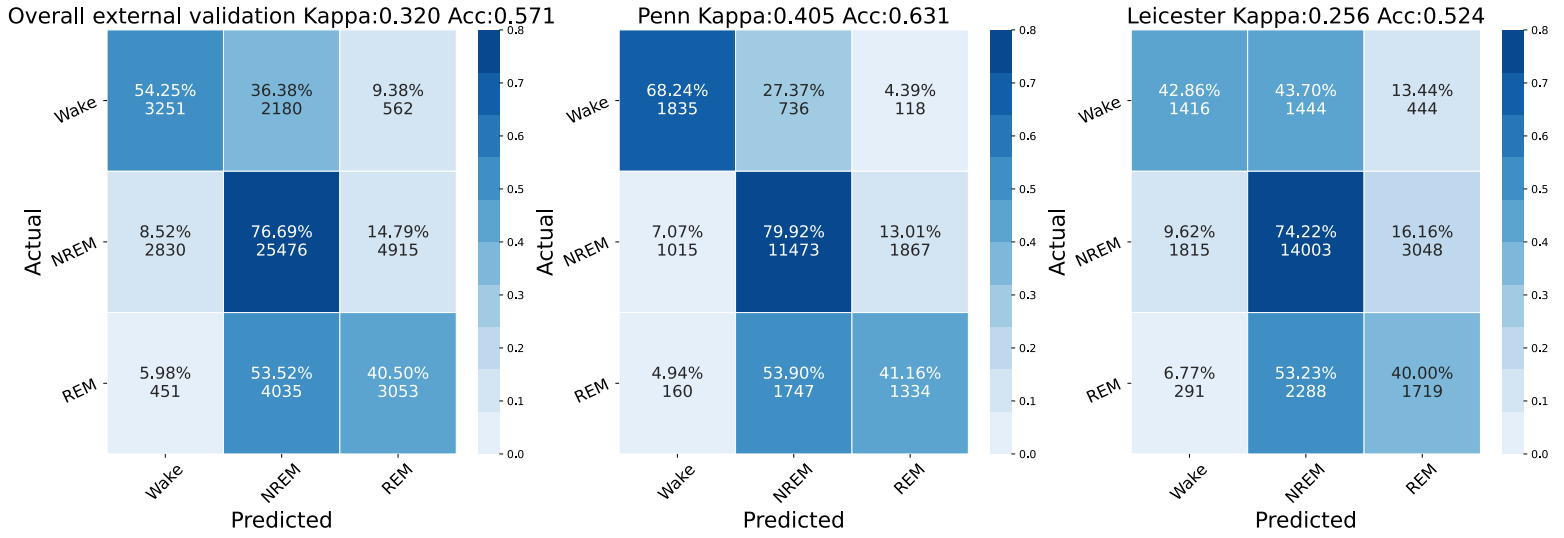

Supplementary Figure 14: **Three-class sleep staging (wake/REM/NREM) for external validation: epoch-to-epoch kappa and balanced accuracies are shown.** The number of predictions and proportion ratios are shown for each pair of ground-truth and prediction class. REM: rapid-eye-movement sleep; NREM: non-rapid-eye-movement sleep.

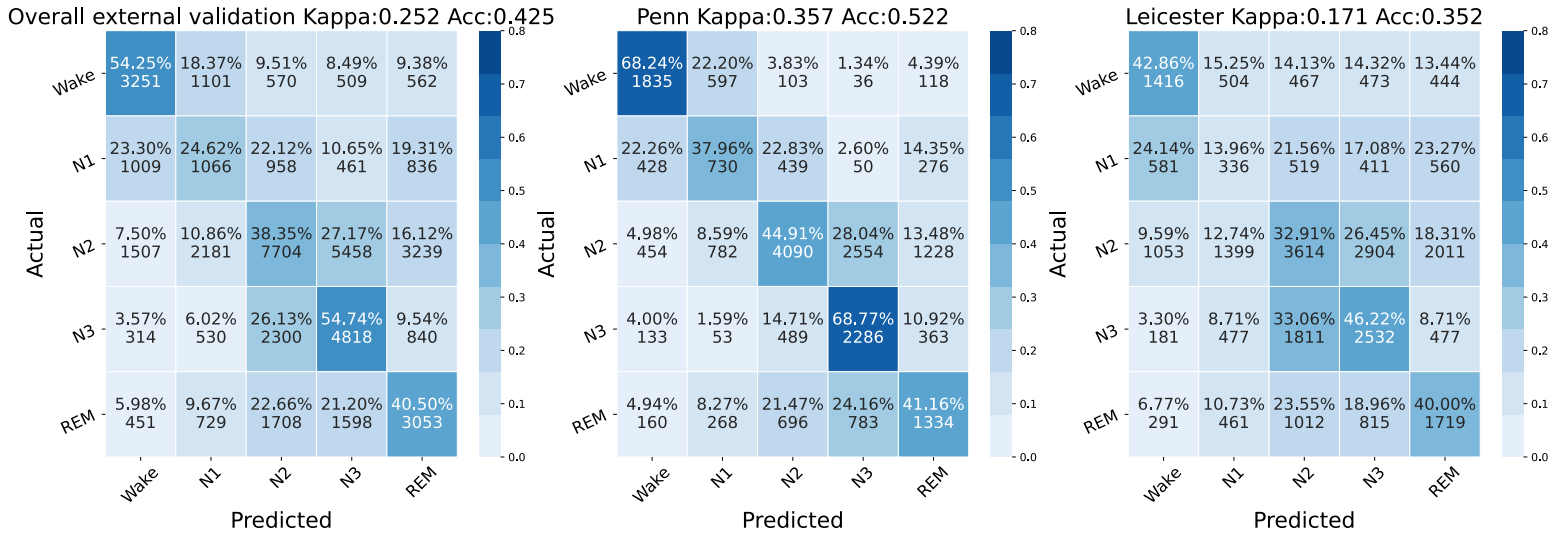

Supplementary Figure 15: **Five-class sleep staging (wake/REM/N1/N2/N3) for external validation: epoch-to-epoch kappa and balanced accuracies are shown.** The number of predictions and proportion ratios are shown for each pair of ground-truth and prediction class. REM: rapid-eye-movement sleep, N1, N2, N3: non-rapid-eye-movement sleep 1, 2, 3.

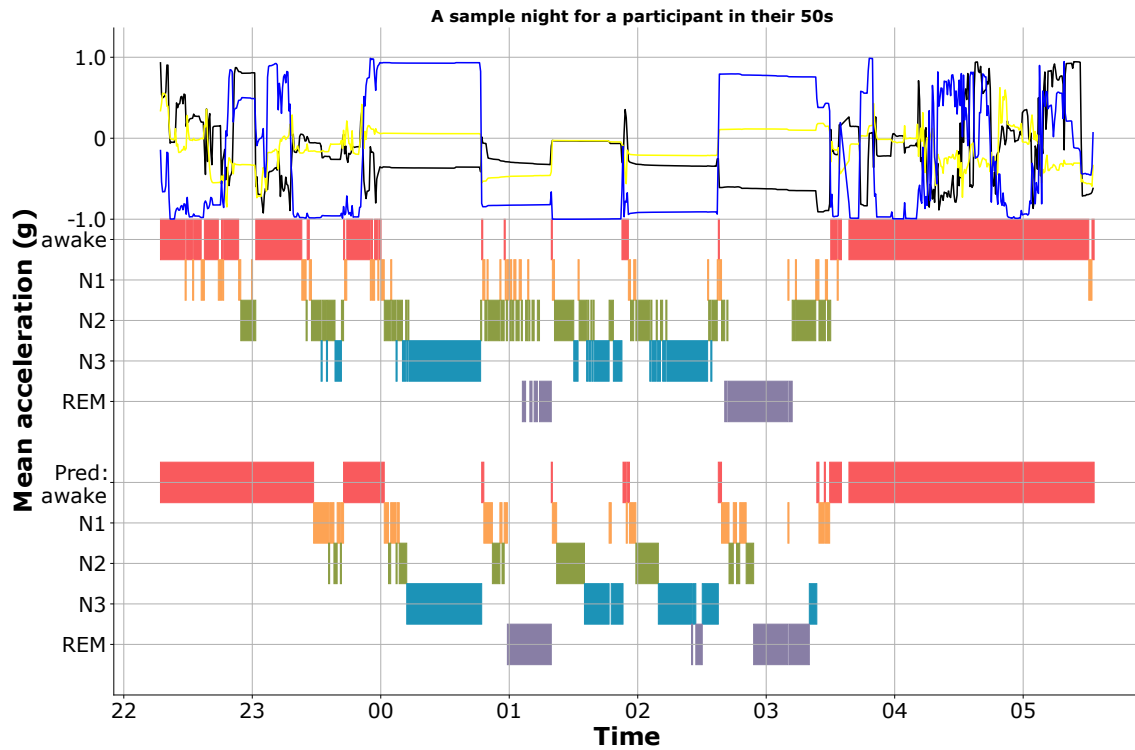

Supplementary Figure 16: **A sample actigram, hypnogram ground truth and prediction for a participant whose sleep stages are well captured:** the **top** hypnogram is the ground-truth and the **bottom** hypnogram is the prediction generated by SleepNet based on the actigram. REM: rapid-eye-movement sleep, N1, N2, N3: non-rapid-eye-movement sleep 1, 2, 3.



Supplementary Figure 17: **Participant flow diagram for the analysis of sleep and all-cause mortality in the UK Biobank.** TDI: Townsend deprivation index, BMI: body mass index, SR\_health: self-reported overall health, SR\_insomnia: self-reported insomnia symptoms, CVD: Cardiovascular disease

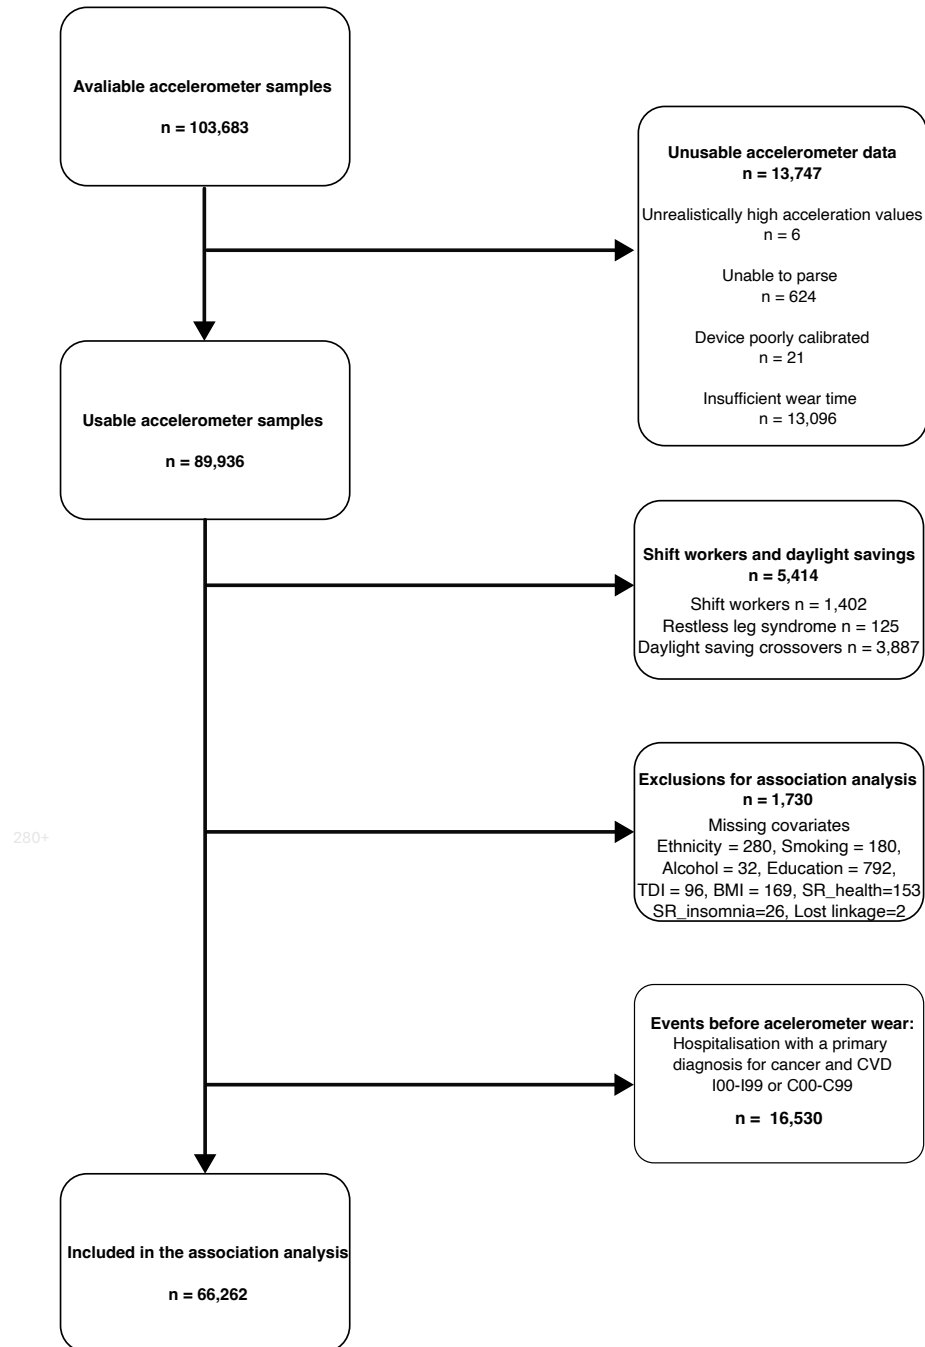

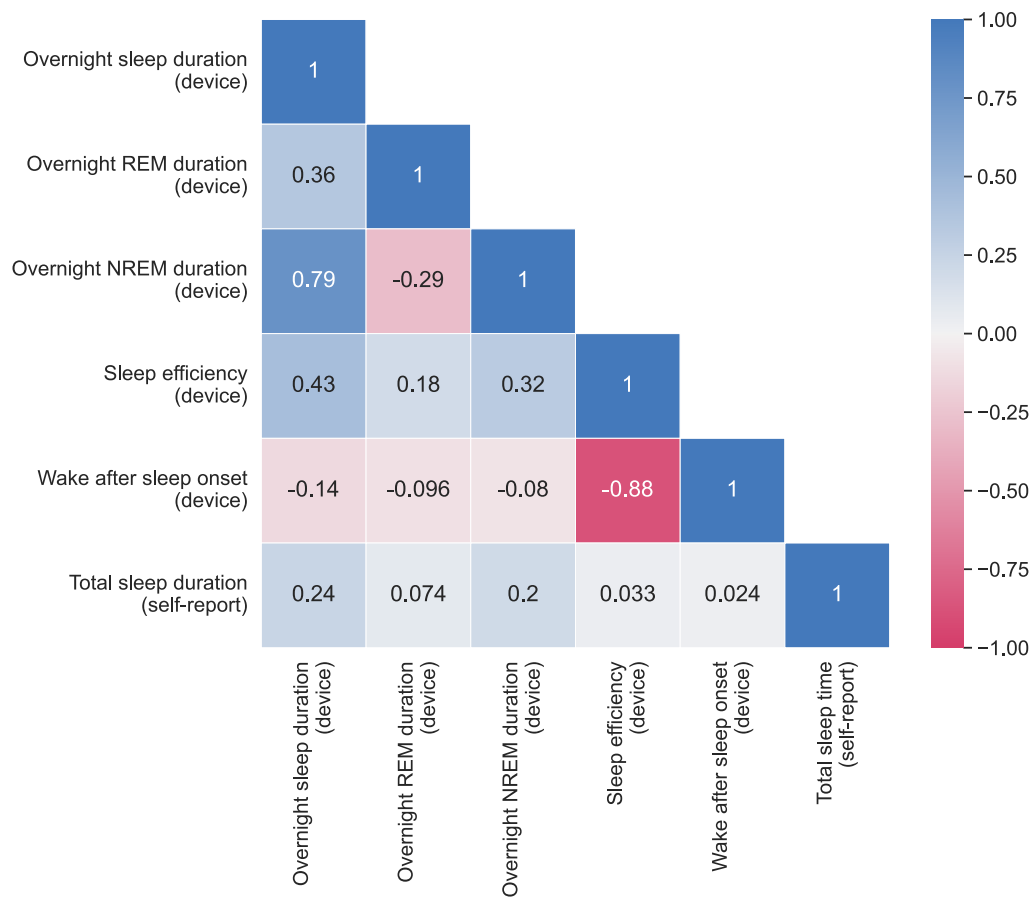

Supplementary Figure 18: **Correlation matrix for device-measured and self-reported sleep parameters on the UK Biobank.** The self-reported total sleep duration was obtained via questionnaire at baseline assessment in the UK Biobank. REM: rapid-eye-movement sleep, NREM: non-rapid-eye-movement sleep.



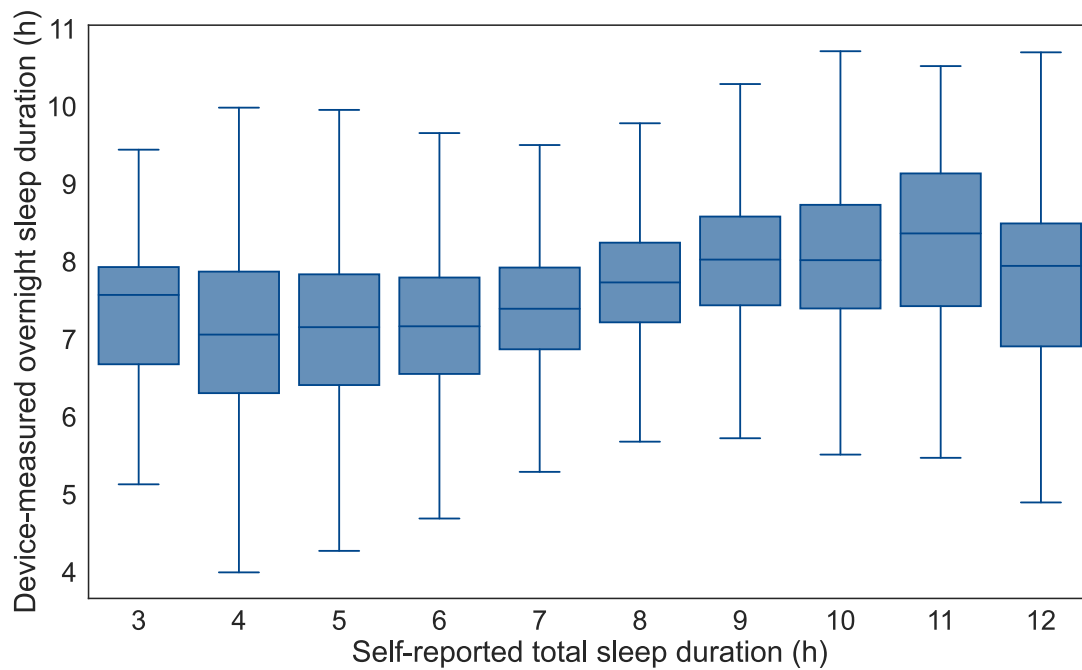

Supplementary Figure 19: **Box plots showing the distributions of device-measured overnight sleep duration against self-reported total sleep duration.** The box whiskers reflect the lowest and highest data points that are 1.5 times of the inter-quartile-range from the median.

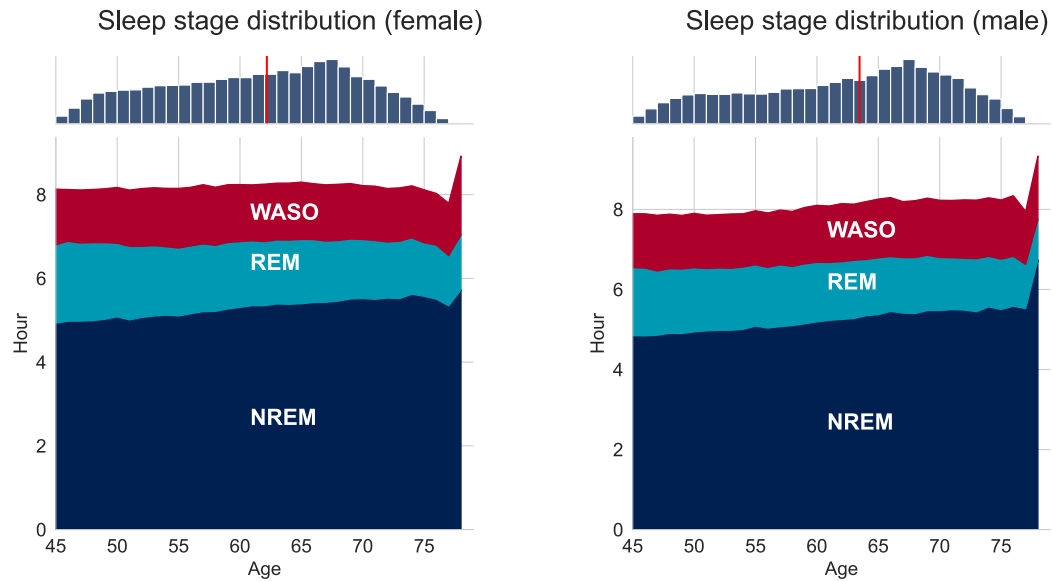

Supplementary Figure 20: **The average device-measured sleep stage distribution with respect to age for both females (left) and males (right) on the UK Biobank.** The histograms on the top show the age distribution for the participants. The red vertical line denotes the median age for each sex. WASO: wake after sleep onset; REM: rapid-eye-movement sleep; NREM: non-rapid-eye-movement sleep.

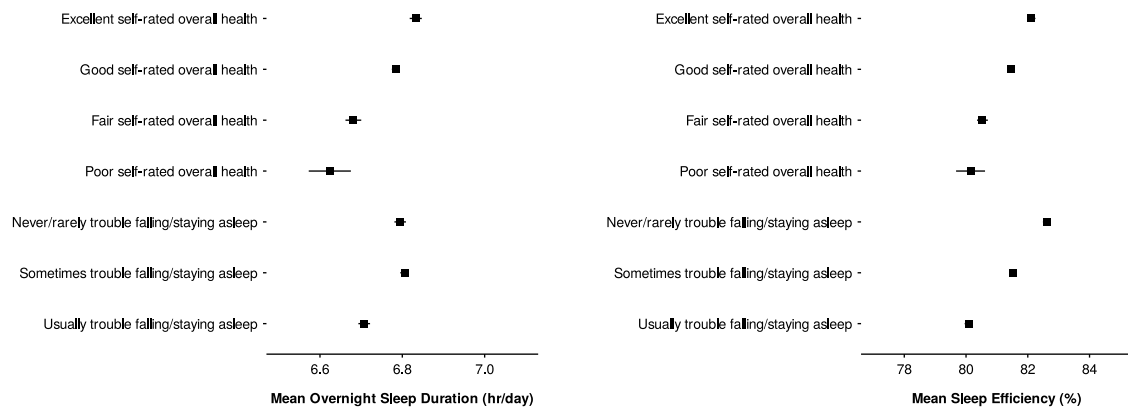

Supplementary Figure 21: **Adjusted marginal mean (95% confidence interval) device-measured mean overnight sleep duration and mean sleep efficiency by self-reported overall health status and insomnia history in the UK Biobank.** Mean overnight sleep duration and sleep efficiency were adjusted for age and sex.

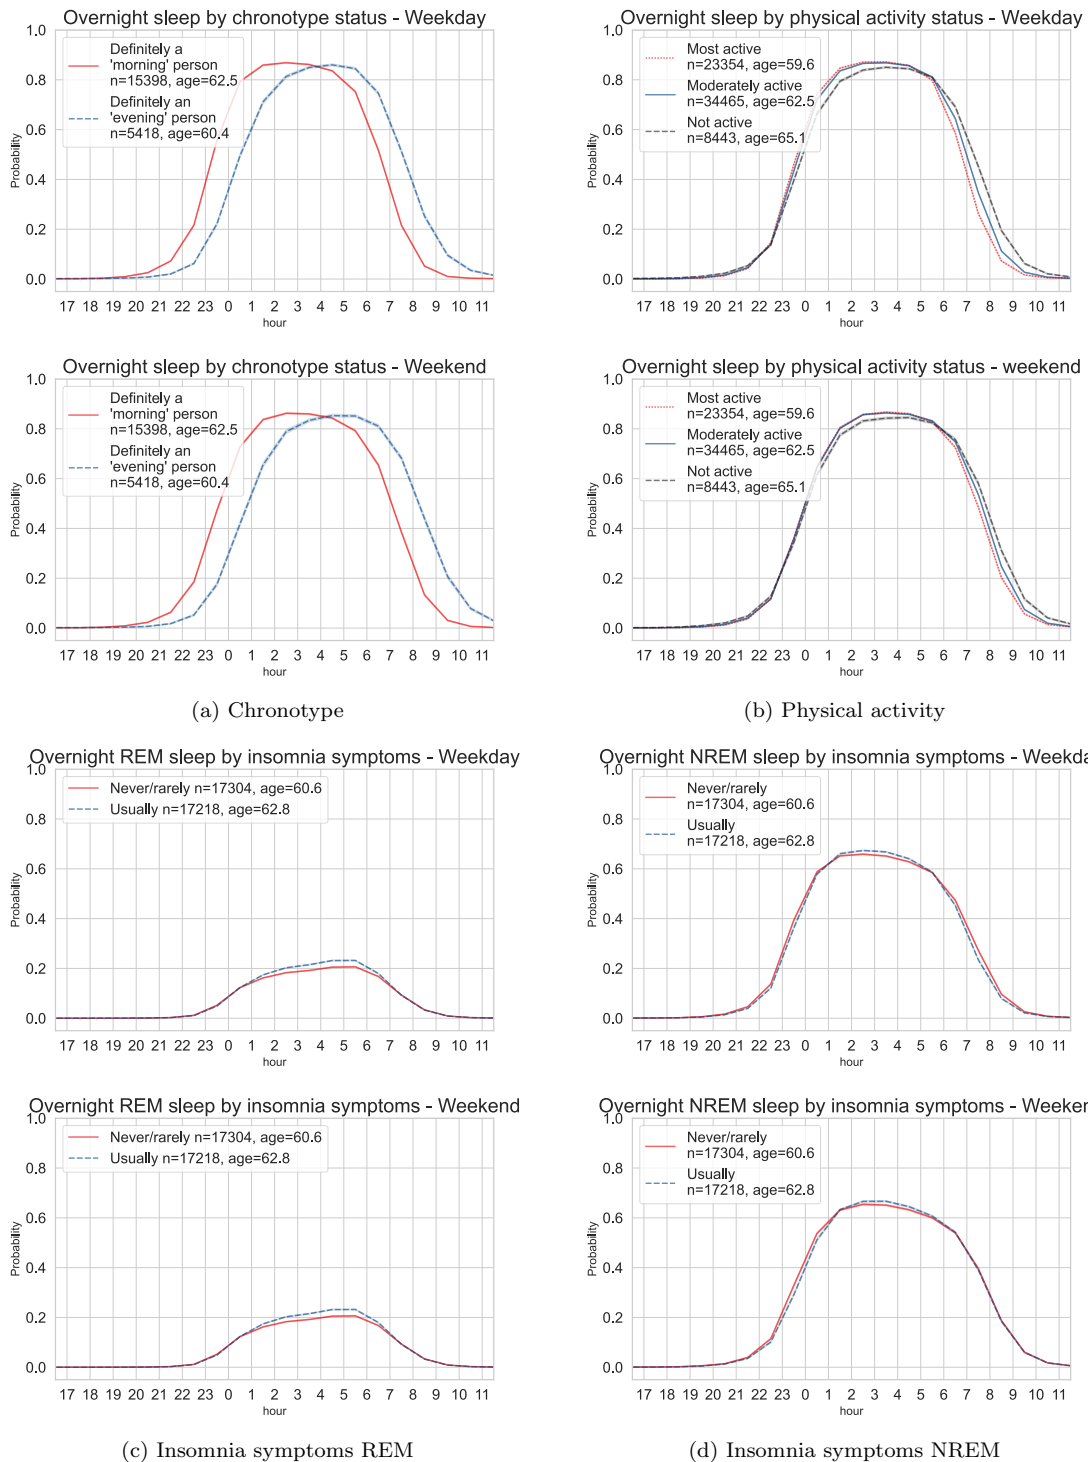

Supplementary Figure 22: **Device-measured sleep probability trajectories throughout the day for the UK Biobank participants (weekday vs weekend)**. Top: variations of the average overnight sleep probability for the participants with self-reported “morning” and “evening” chronotype (a) and the overnight sleep distributions across thirds of device-measured physical activity level (b). Bottom: variations of the average REM (c) and NREM (d) probability in participants with a history of self-reported insomnia symptoms versus those without. Rapid-eye-movement sleep (REM), and non-rapid-eye-movement sleep (NREM). Areas of squares represent the inverse of the variance of the log risk. And the I bars denote the 95% confidence interval for the floated risks.

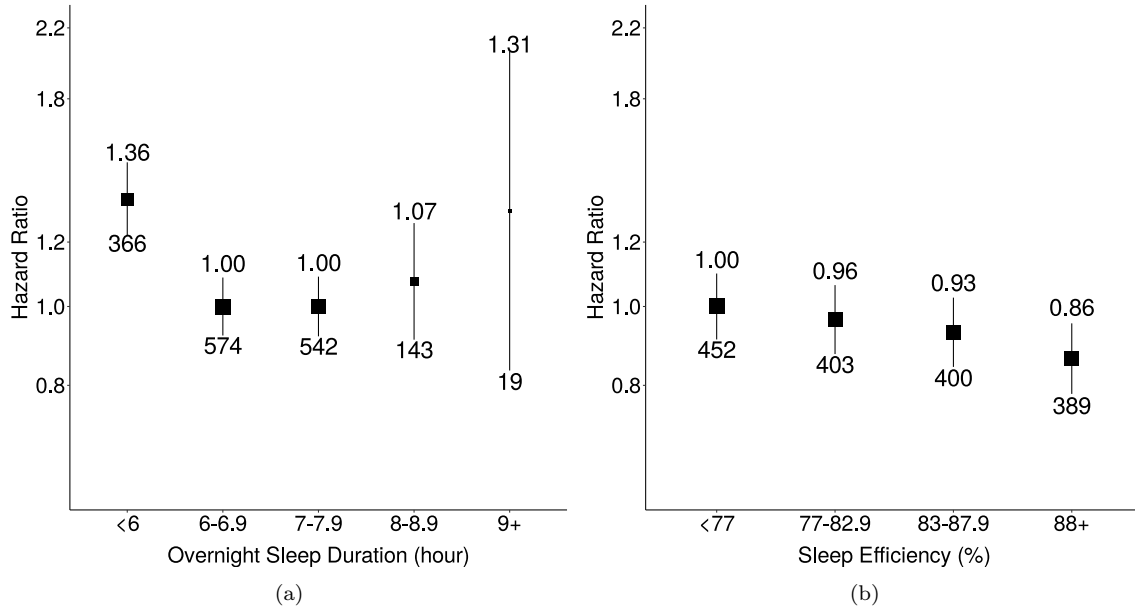

Supplementary Figure 23: **Associations of overnight sleep duration (a) and sleep efficiency in quantiles (b) with all-cause mortality.** The model used 1,644 events among 66,262 participants. We used age as the timescale and adjusted for sex, ethnicity, Townsend Deprivation Index of baseline address (split by quarter in the study population), educational qualifications, smoking status, alcohol consumption (Never, <3 times/week, 3+ times/week), overall activity (measured in milli-gravity units). Areas of squares represent the inverse of the variance of the log risk. The I bars denote the 95% confidence interval for the floated risks.

847 2.3.1. Models additionally adjusted for body mass index

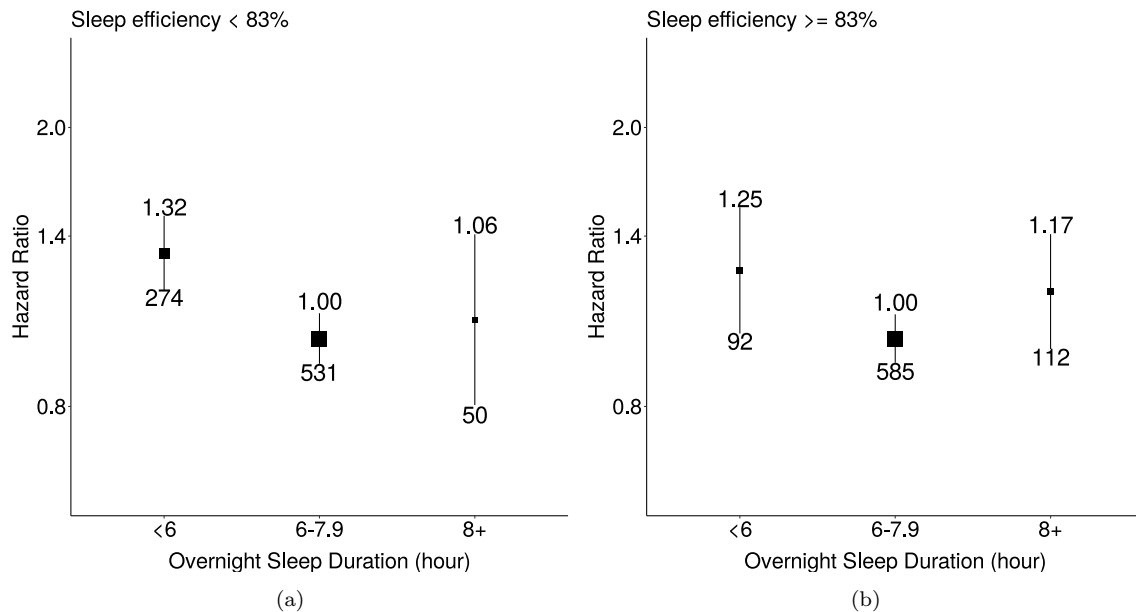

Supplementary Figure 24: **Associations of overnight sleep duration with all-cause mortality for groups with low and high sleep efficiency additionally adjusted for body mass index.** The model used 1,644 events among 66,262 participants. We used age as the timescale and adjusted for sex, ethnicity, Townsend Deprivation Index of baseline address (split by quarter in the study population), educational qualifications, smoking status, alcohol consumption (Never, <3 times/week, 3+ times/week), overall activity (measured in milli-gravity units). The median was used to separate groups with low and high sleep efficiency. Areas of squares represent the inverse of the variance of the log risk. The I bars denote the 95% confidence interval for the floated risks.

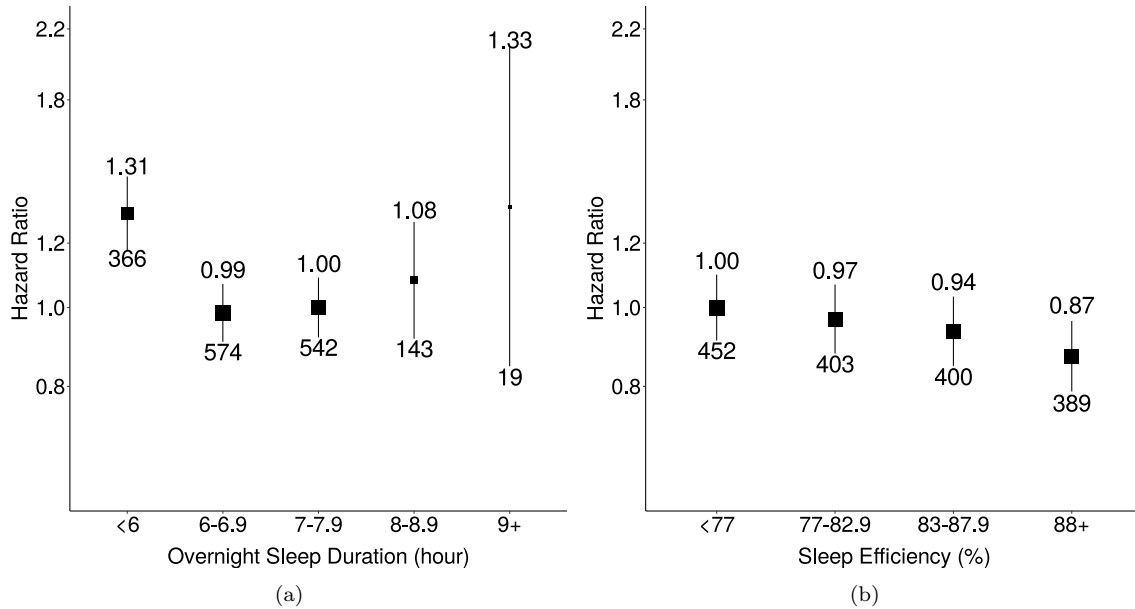

Supplementary Figure 25: **Associations of overnight sleep duration (a) and sleep efficiency in quantiles (b) with all-cause mortality additionally adjusted for body mass index.** The model used 1,644 events among 66,262 participants. We used age as the timescale and adjusted for sex, ethnicity, Townsend Deprivation Index of baseline address (split by quarter in the study population), educational qualifications, smoking status, alcohol consumption (Never, <3 times/week, 3+ times/week), overall activity (measured in milli-gravity units), and body mass index. Areas of squares represent the inverse of the variance of the log risk. The I bars denote the 95% confidence interval for the floated risks.

848 **References**

- 849 [1] Aiden Doherty et al. “Large scale population assessment of physical activity  
850 using wrist worn accelerometers: the UK biobank study”. In: *PloS One* 12.2  
851 (2017), e0169649.
- 852 [2] Leon Straker et al. “Cohort profile: the Western Australian pregnancy cohort  
853 (Raine) study–Generation 2”. In: *International Journal of Epidemiology* 46.5  
854 (2017), 1384–1385j.
- 855 [3] Vincent van Hees, Sarah Charman, and Kirstie Anderson. *Newcastle polysomnog-*  
856 *raphy and accelerometer data*. Version 1.0. Zenodo, Jan. 2018. DOI: 10.5281/  
857 *zenodo.1160410*. URL: <https://doi.org/10.5281/zenodo.1160410>.
- 858 [4] Tatiana Plekhanova et al. “Validation of an automated sleep detection algo-  
859 rithm using data from multiple accelerometer brands”. In: *Journal of Sleep*  
860 *Research* (2022).
- 861 [5] Enda M Byrne, Philip R Gehrman, Maciej Trzaskowski, Henning Tiemeier,  
862 and Allan I Pack. “Genetic correlation analysis suggests association between  
863 increased self-reported sleep duration in adults and schizophrenia and type 2  
864 diabetes”. In: *Sleep* 39.10 (2016), pp. 1853–1857.
- 865 [6] Manon L Dontje, Peter Eastwood, and Leon Straker. “Western Australian preg-  
866 nancy cohort (Raine) study: generation 1”. In: *BMJ open* 9.5 (2019), e026276.
- 867 [7] Cathie Sudlow et al. “UK biobank: an open access resource for identifying the  
868 causes of a wide range of complex diseases of middle and old age”. In: *PLoS*  
869 *Medicine* 12.3 (2015), e1001779.

- 870 [8] Hang Yuan et al. “Self-supervised Learning for Human Activity Recognition  
871 Using 700,000 Person-days of Wearable Data”. In: *arXiv preprint arXiv:2206.02909*  
872 (2022).
- 873 [9] Kaiming He, Xiangyu Zhang, Shaoqing Ren, and Jian Sun. “Identity map-  
874 pings in deep residual networks”. In: *European Conference on Computer Vi-*  
875 *sion*. Springer. 2016, pp. 630–645.
- 876 [10] Diederik P Kingma and Jimmy Ba. “Adam: A method for stochastic optimiza-  
877 tion”. In: *arXiv preprint arXiv:1412.6980* (2014).
- 878 [11] Zhiheng Huang, Wei Xu, and Kai Yu. “Bidirectional LSTM-CRF models for  
879 sequence tagging”. In: *arXiv preprint arXiv:1508.01991* (2015).
- 880 [12] Kalaivani Sundararajan et al. “Sleep classification from wrist-worn accelerom-  
881 eter data using random forests”. In: *Scientific Reports* 11.1 (2021), pp. 1–10.
- 882 [13] Rosemary Walmsley et al. “Reallocation of time between device-measured  
883 movement behaviours and risk of incident cardiovascular disease”. In: *British*  
884 *Journal of Sports Medicine* 56.18 (2022), pp. 1008–1017.
- 885 [14] Max Hirshkowitz et al. “National Sleep Foundation’s updated sleep duration  
886 recommendations”. In: *Sleep health* 1.4 (2015), pp. 233–243.
- 887 [15] Bin Yan et al. “Objective sleep efficiency predicts cardiovascular disease in  
888 a community population: the sleep heart health study”. In: *Journal of the*  
889 *American Heart Association* 10.7 (2021), e016201.



- 890 [16] Douglas F Easton, Julian Peto, and Abdel GAG Babiker. “Floating absolute  
891 risk: an alternative to relative risk in survival and case-control analysis avoiding  
892 an arbitrary reference group”. In: *Statistics in Medicine* 10.7 (1991), pp. 1025–  
893 1035.
- 894 [17] Martyn Plummer and Bendix Carstensen. “Lexis: An R Class for Epidemio-  
895 logical Studies with Long-Term Follow-Up”. In: *Journal of Statistical Software*  
896 38.5 (2011), pp. 1–12. URL: <https://www.jstatsoft.org/v38/i05/>.
- 897 [18] Martyn Plummer. “Improved estimates of floating absolute risk”. In: *Statistics*  
898 *in Medicine* 23.1 (2004), pp. 93–104.
- 899 [19] Terry K Koo and Mae Y Li. “A guideline of selecting and reporting intra-  
900 class correlation coefficients for reliability research”. In: *Journal of Chiropractic*  
901 *Medicine* 15.2 (2016), pp. 155–163.
